# Supplementary material for: The enteric pathogen Cryptosporidium parvum exports proteins into the cytosol of the infected host cell
Source: eLife. 2021 Dec 6;10:e70451. doi: 10.7554/eLife.70451 (PMC8687662; doi:10.7554/eLife.70451)
Supplement: Figure 2—source data 1. [file elife-70451-fig2-data1.xlsx]

## Sheet: Sheet1
Figure 3- source data. The numerical data used to produce the quantification of
the number of HA positive host cells (red cells) compared to intracellular parasites at
various time points post infection is provided.
Time post infection (hours)	Red cells	Intracellular parasites
6	154	194
12	195	271
24	389	709
36	665	1633
48	733	1688
60	727	2164
72	632	1104
