# Supplementary material for: The enteric pathogen Cryptosporidium parvum exports proteins into the cytosol of the infected host cell
Source: eLife. 2021 Dec 6;10:e70451. doi: 10.7554/eLife.70451 (PMC8687662; doi:10.7554/eLife.70451)
Supplement: Figure 3—source data 1. [file elife-70451-fig3-data1.xlsx]

## Sheet: Sheet1
Source data Figure 3E- The numerical data used to produce the quantification of HA positive (MEDLE expressing) host ells in the absence (BFA un) and presence (BFA) of Brefeldin A treatment.
Image name	Infected cells	Medle expressing cells
BFA un.1	5	8
BFA un.2	6	7
BFA un.3	7	10
BFA un.4	24	24
BFA un.5	15	15
BFA un.6	29	29
BFA un.7	17	17
BFA un.8	14	14
BFA un.9	15	15
BFA un.10	9	9
BFA un.11	23	23
BFA un.12	9	9
BFA un.13	10	10
BFA un.14	8	8
BFA.1	11	0
BFA.2	10	0
BFA.3	8	4
BFA.4	6	0
BFA.5	5	1
BFA.6	5	0
BFA.7	5	0
BFA.8	4	0
BFA.9	6	0
BFA.10	13	0
BFA.11	10	0
BFA.12	4	0
BFA.13	7	0
BFA.14	4	0
