# Supplementary material for: The enteric pathogen Cryptosporidium parvum exports proteins into the cytosol of the infected host cell
Source: eLife. 2021 Dec 6;10:e70451. doi: 10.7554/eLife.70451 (PMC8687662; doi:10.7554/eLife.70451)
Supplement: Figure 6—source data 1. [file elife-70451-fig6-data1.xlsx]

## Sheet: Sheet1
Figure 6- Source Data 1. GSEA results following MEDLE2 transfection into HEK293T cells containing a description of the GSEA pathway, the net enrichment score (NES), the adjusted p value and the core enrichment genes.
Description	NES	p.adjust	core_enrichment
REACTOME_EUKARYOTIC_TRANSLATION_ELONGATION	2.43609	9.73622e-07	RPL37/RPS27/RPL36A/RPL22L1/RPL12/RPS29/RPL24/RPL34/RPL27/RPL31/RPL39/RPL39L/RPS28/RPL10A/RPL37A/RPS12/RPL21/RPL36/RPS17/RPLP2/RPS14/RPS21/RPL26/RPL38/RPS15A/RPS18/RPL41/RPS23/RPS27L/RPL17/RPL32/RPS26/EEF1A2/RPL22/RPL23/RPS13/RPS25/UBA52/RPL9/RPS11/FAU/RPS15/RPS19/RPL11/RPS27A/RPL30/RPL35A/RPL7/RPL28/RPL35/RPLP1/RPS8/RPL13/RPL23A/RPS20/RPL14/RPS24/RPS7/RPL18/RPS6/RPS3/RPL18A/RPS10/RPS3A/RPL36AL/RP…
KEGG_RIBOSOME	2.39637	9.74106e-07	RSL24D1/RPL37/RPS27/RPL36A/RPL22L1/RPL12/RPS29/RPL24/RPL34/RPL27/RPL31/RPL39/RPS28/RPL10A/RPL37A/RPS12/RPL21/RPL36/RPS17/RPLP2/RPS21/RPL26/RPL38/RPS15A/RPS18/RPL41/RPS23/RPS27L/RPL17/RPL32/RPS26/RPL22/RPL23/RPS13/RPS25/UBA52/RPL9/RPS11/FAU/RPS15/RPS19/RPL11/RPS27A/RPL30/RPL35A/RPL7/RPL28/RPL35/RPLP1/RPS8/RPL13/RPL23A/RPS20/RPL14/RPS24/RPS7/RPL18/RPS6/RPS3/RPL18A/RPS10/RPS3A/RPL36AL/RPL10/RPL6/RPS…
REACTOME_RESPONSE_OF_EIF2AK4_GCN2_TO_AMINO_ACID_DEFICIENCY	2.37296	9.74106e-07	DDIT3/CEBPB/TRIB3/CEBPG/ASNS/RPL37/RPS27/RPL36A/ATF4/RPL22L1/RPL12/RPS29/RPL24/RPL34/RPL27/RPL31/RPL39/RPL39L/RPS28/ATF3/RPL10A/RPL37A/RPS12/EIF2S2/RPL21/RPL36/RPS17/RPLP2/RPS14/RPS21/RPL26/RPL38/RPS15A/RPS18/RPL41/RPS23/RPS27L/RPL17/RPL32/RPS26/RPL22/RPL23/RPS13/RPS25/UBA52/RPL9/RPS11/FAU/RPS15/RPS19/RPL11/RPS27A/RPL30/RPL35A/RPL7/RPL28/RPL35/RPLP1/RPS8/RPL13/RPL23A/RPS20/RPL14/RPS24/RPS7/RPL18/…
FISCHER_G2_M_CELL_CYCLE	-2.03769	1.22859e-06	TRIM59/UBE2C/BIRC5/CCNB2/JADE2/CDC27/CENPE/CEP350/KIF15/PSMD11/SIX4/NUP50/PTTG1/TMPO/KCTD9/CHEK2/CKAP5/HP1BP3/MTMR6/SLC25A24/ARHGAP11B/NIF3L1/DCLRE1C/KIF11/HMG20B/NDE1/CENPA/DBF4B/SMTN/TDP1/CYP1A1/CCNA2/MPHOSPH9/KIF18B/KIFC1/TTK/TRIP13/ZNF207/EIF2AK3/CDC42EP4/NDC1/TNFRSF21/HMMR/KDM6A/MGAT2/GTSE1/BUB1/ELK3/KPNA2/TPX2/CDC25B/CNTROB/TOP2A/NUP35/VANGL1/BAG3/POLQ/STK17B/PIF1/GPSM2/ZNF614/CDCA8/MKI67/P…
REACTOME_SELENOAMINO_ACID_METABOLISM	2.30187	1.22859e-06	PSTK/AIMP1/RPL37/RPS27/RPL36A/RPL22L1/RPL12/RPS29/RPL24/RPL34/RPL27/RPL31/RPL39/RPL39L/RPS28/RPL10A/RPL37A/RPS12/RPL21/CTH/RPL36/RPS17/RPLP2/RPS14/RPS21/RPL26/RPL38/RPS15A/RPS18/RPL41/RPS23/RPS27L/RPL17/AIMP2/RPL32/RPS26/RPL22/RPL23/RPS13/RPS25/UBA52/RPL9/RPS11/FAU/RPS15/RPS19/RPL11/RPS27A/RPL30/RPL35A/RPL7/RPL28/RPL35/RPLP1/RPS8/RPL13/RPL23A/RPS20/GSR/RPL14/RPS24/RPS7/RPL18/RPS6/RPS3/RPL18A/RPS1…
MEISSNER_NPC_HCP_WITH_H3K4ME2_AND_H3K27ME3	2.1103	1.68717e-06	DSCAML1/KCNA3/RPRML/ECEL1/ACTL6B/NOG/ABCG1/NFATC2/TMEM163/NPTXR/ZNF296/SRCIN1/SGPP2/HMX1/PAQR9/VAX1/BAIAP2L1/SEMA7A/COBL/FOXG1/COL13A1/HELT/KCNC4/TBX1/AMIGO2/KCNS3/SLC12A5/SALL4/PPP2R2C/NKX6-1/EMX1/HRK/NOTUM/CALCR/ADAMTS2/GPR27/FIBCD1/FOXD3/GJA3/FLT3/TESC/EIF4E3/KCNQ2/BNC1/BICDL1/OPRD1/SP8/SCN5A/CASZ1/GABRB1/JAG2/STX3/SYT14/CPLX1/TP73/OVOL2/PHLDA2/GNG4/CABP7/RERG/HOXD11/CDH8/GJB2/SPINT1/NPAS1/TME…
REACTOME_EUKARYOTIC_TRANSLATION_INITIATION	2.29647	3.2004e-06	EIF4EBP1/RPL37/RPS27/RPL36A/RPL22L1/RPL12/RPS29/RPL24/RPL34/RPL27/EIF5/RPL31/RPL39/RPL39L/RPS28/RPL10A/RPL37A/RPS12/EIF2S2/RPL21/RPL36/RPS17/RPLP2/RPS14/RPS21/RPL26/RPL38/RPS15A/RPS18/RPL41/RPS23/RPS27L/RPL17/RPL32/RPS26/RPL22/RPL23/RPS13/RPS25/UBA52/RPL9/RPS11/FAU/RPS15/RPS19/RPL11/RPS27A/RPL30/RPL35A/RPL7/RPL28/RPL35/RPLP1/RPS8/RPL13/RPL23A/RPS20/EIF2B3/RPL14/RPS24/RPS7/RPL18/RPS6/RPS3/RPL18A/R…
MIKKELSEN_MEF_HCP_WITH_H3K27ME3	1.9887	3.57325e-06	GRIN2A/DSCAML1/ECEL1/ACTL6B/GFI1/OTP/ELFN2/TRPM3/LARGE2/TMEM59L/TNFRSF9/SRCIN1/ATP8A2/C14orf39/FNDC5/SVOP/HMX1/VAX1/GAL/PRRT3/PCDH8/DEGS2/FOXG1/SYPL2/HTRA3/LAMC3/SLC12A5/SALL4/SLC6A11/TTYH1/NEUROD1/PPP2R2C/SLC5A5/TMEM91/ZNF804A/NKX6-1/ATP12A/EMX1/FAM163A/GOLGA7B/HRK/B3GALT5/LAMC2/AARD/OLFML2A/CALCR/DRD2/PRR36/DMRT1/CD70/FOXD3/MCF2L/NKX6-2/NPY5R/FGF11/CNFN/RIMKLA/SNCB/FOXB1/ACSL6/KCNQ2/TNNI3/ATP1A…
WP_CYTOPLASMIC_RIBOSOMAL_PROTEINS	2.32117	4.66856e-06	RPL37/RPS27/RPL36A/RPL12/RPS29/RPL24/RPL34/RPL27/RPL31/RPL39/RPS28/RPL10A/RPL37A/RPS12/RPL21/RPL36/RPS17/RPLP2/RPS14/RPS21/RPL26/RPL38/RPS15A/RPS18/RPL41/RPS23/RPL17/RPL32/RPS26/RPL22/RPL23/RPS13/RPS25/UBA52/RPL9/RPS11/FAU/RPS15/RPS19/RPL11/RPS27A/RPL30/RPL35A/RPL7/RPL28/RPL35/RPLP1/RPS8/RPL13/RPL23A/RPS20/RPL14/RPS24/RPS7/RPL18/RPS6/RPS3/RPL18A/RPS10/RPS3A/RPL10/RPL6/RPS9/RPL27A/RPS16/RPL19/RPS5…
REACTOME_TRANSLATION	1.95241	4.66897e-06	EIF4EBP1/SEC61G/AIMP1/MRPS18C/MRPL52/RPL37/RPS27/RPL36A/RPL22L1/RPL12/RPS29/RPL24/RPL34/RPL27/EIF5/RPL31/RPL39/RPL39L/RPS28/RPL10A/RPL37A/RPS12/EIF2S2/MRPS31/RPL21/MRPL2/RPL36/RPS17/MRPL58/MRPS18B/RPLP2/RPS14/RPS21/SRP19/RPL26/RPL38/RPS15A/RPS18/MRPL22/MRPL35/RPL41/RPS23/RPS27L/MRPL47/RPL17/AIMP2/RPL32/MRPS36/RPS26/EEF1A2/MRPS30/RPL22/RPL23/RPS13/RPS25/UBA52/MRPS11/RPL9/FARSB/MRPL21/MRPS5/RPS11/F…
BLANCO_MELO_MERS_COV_INFECTION_MCR5_CELLS_UP	-2.05404	6.45504e-06	MYLIP/UNC13D/BAG3/CDC14A/MYLK3/ADAM32/MFSD2B/DNHD1/KIAA0895/PTAFR/NAALAD2/PPRC1/ZNF462/NAA16/ABL2/CFAP43/NFATC3/ZNF317/ANKAR/GPR35/NHLH1/LEAP2/CCDC62/AVIL/SORBS1/ADGRF3/MXD1/COL26A1/RBM15/ALDH8A1/ZNF543/GRHL1/LAT2/ABCC2/TINCR/HUNK/C5AR1/CPEB3/PYGM/CGN/DCAF4L1/SYT16/TNXB/UBAP1L/ZC3H12A/AOC2/EPPK1/ZBTB37/MYH3/ACTRT3/CLIC2/AOC3/CDC42BPG/C1orf162/DNAJB1/ADM5/FERMT3/SPOCK2/HSPA1B/HSPA1A/HSPA6
REACTOME_SRP_DEPENDENT_COTRANSLATIONAL_PROTEIN_TARGETING_TO_MEMBRANE	2.21866	7.32225e-06	SEC61G/RPL37/RPS27/RPL36A/RPL22L1/RPL12/RPS29/RPL24/RPL34/RPL27/RPL31/RPL39/RPL39L/RPS28/RPL10A/RPL37A/RPS12/RPL21/RPL36/RPS17/RPLP2/RPS14/RPS21/SRP19/RPL26/RPL38/RPS15A/RPS18/RPL41/RPS23/RPS27L/RPL17/RPL32/RPS26/RPL22/RPL23/RPS13/RPS25/UBA52/RPL9/RPS11/FAU/RPS15/RPS19/RPL11/RPS27A/RPL30/RPL35A/RPL7/RPL28/RPL35/RPLP1/RPS8/SEC11C/RPL13/RPL23A/RPS20/RPL14/RPS24/RPS7/RPL18/RPS6/RPS3/RPL18A/RPS10/RPS…
REACTOME_CELLULAR_RESPONSE_TO_HEAT_STRESS	-2.25406	3.52304e-05	NUP50/DEDD2/RPTOR/COL4A6/ATR/DNAJB6/HSPA4L/NUP133/MTOR/HSP90AA1/CCAR2/FKBP4/NUP62/SEH1L/MAPK3/NUP85/NDC1/TNFRSF21/CAMK2B/NUP214/POM121/RANBP2/HSPA12A/NUP35/RPA1/BAG3/NUP153/HSPA4/VCP/EP300/HSPA5/HSPA13/NUP98/MAPK1/NUP188/HSPH1/SERPINH1/HSP90AB1/NUP58/POM121C/HSPA2/DNAJB1/HSPA8/HSPA1B/HSPA1A/HSPA6
SMIRNOV_RESPONSE_TO_IR_6HR_DN	-2.31377	4.44997e-05	SCD/MYC/STAG3/PSRC1/CDC20/KIF23/CDCA3/CCNG2/DLGAP5/ASPM/CLEC2D/GEMIN4/DEPDC1/CCNB1/ARHGAP11A/EGLN3/ELOVL6/PLK1/AURKA/KIF14/STS/EGR3/INSIG1/SUN2/SLC16A3/KIF20A/ATP2A3/NR4A2/LDLR/OAS1/P2RX5
MEISSNER_NPC_HCP_WITH_H3K4ME2	1.79948	4.44997e-05	VIPR2/LIF/C2CD4C/C2orf88/COL16A1/HS3ST3A1/FA2H/NKD2/PTHLH/LMX1B/NFATC2/TRPM3/DUSP15/CCDC3/CTSF/EMILIN2/C16orf74/CEBPB/GSC/COMP/SNTA1/SVOP/SYT13/HPS6/GALNT12/SLITRK4/ERFE/RIMS1/SYPL2/REEP2/N4BP3/LRRK1/CCDC122/SLC16A12/ZNF804A/CACNA1B/CREB3L1/GOLGA7B/TTC39A/TSC22D3/GNAL/AVPR1A/CLMP/NFE2L3/IL13RA1/AGBL4/CSRP1/PIK3AP1/LGR6/NKX6-2/LTK/ARC/KCNK6/NTF4/RCAN2/RIMKLA/ITPKA/SNCB/FBLN2/MAPK8IP1/MTUS2/ACE/ATP…
MIKKELSEN_NPC_HCP_WITH_H3K27ME3	1.9798	6.34929e-05	DSCAML1/RPRML/ECEL1/GFI1/OTP/ABCG1/NFATC2/TMEM163/NPTXR/PGR/SRCIN1/SGPP2/VAX1/COBL/DEGS2/FOXG1/COL13A1/MESP1/AMIGO2/KCNS3/SLC12A5/SALL4/PPP2R2C/TMEM91/NKX6-1/ATP12A/EMX1/CALCR/DRD2/GPR27/DMRT1/FIBCD1/FOXD3/HOXA11/FLT3/KCNK6/HOXB2/EIF4E3/KCNQ2/BNC1/FSTL4/HOXC13/MAL2/OPRD1/SP8/PPM1N/SCN5A/JAG2/POU2F3/CPLX1/TP73/HOXB7/OVOL2/PHLDA2/PTPRN/CABP7/HOXD11/CDH8/HECW1/GJB2/SPINT1/NPAS1/TMEM132E/KCNK3/PRKCZ/…
WP_PARKINUBIQUITIN_PROTEASOMAL_SYSTEM_PATHWAY	-2.34435	6.56286e-05	TUBB3/UBA1/PSMD3/SNCA/TUBB4A/PSMD2/TUBA1B/TUBB6/PSMD1/PSMD10/FBXW7/HSPA4/UBE2G2/HSPA5/TUBB/TUBB4B/RNF19A/TUBA1C/HSPA2/TUBA8/HSPA8/HSPA1B/HSPA1A/HSPA6
REACTOME_RRNA_PROCESSING	1.96337	7.11699e-05	RRP36/BOP1/TSR3/RPP21/NOL9/RPL37/RPS27/RPL36A/RPL22L1/RPP40/RPL12/RPS29/RPL24/RPL34/EXOSC8/RPL27/RPL31/RPL39/RPL39L/RPS28/GAR1/RPL10A/RPL37A/RPS12/RPL21/RPL36/RPS17/RPLP2/EXOSC1/RPS14/RPS21/RPL26/RPL38/RPS15A/RPS18/RPL41/RPS23/RPS27L/RPL17/TFB1M/RPL32/RPS26/RPL22/RPL23/RPS13/RPS25/UBA52/RPL9/NSUN4/RIOK2/RPS11/EXOSC4/FAU/RPS15/RPS19/EMG1/RPL11/RPS27A/RPL30/EXOSC9/RPL35A/RPL7/RPL28/RPL35/RPLP1/RPS8…
REACTOME_REGULATION_OF_HSF1_MEDIATED_HEAT_SHOCK_RESPONSE	-2.24521	8.80319e-05	MAPK3/NUP85/NDC1/TNFRSF21/NUP214/POM121/RANBP2/HSPA12A/NUP35/RPA1/BAG3/NUP153/HSPA4/HSPA5/HSPA13/NUP98/MAPK1/NUP188/HSPH1/SERPINH1/NUP58/POM121C/HSPA2/DNAJB1/HSPA8/HSPA1B/HSPA1A/HSPA6
MIKKELSEN_MCV6_HCP_WITH_H3K27ME3	1.88631	9.52362e-05	RPRML/ECEL1/L1CAM/NKD2/NOG/ELFN2/LMX1B/ABCG4/TMEM59L/KCNMA1/NPTXR/COMP/ATP8A2/DOK6/FNDC5/HMX1/PHYHIPL/GAL/SEMA7A/HBQ1/COL13A1/GRIP1/KCNC4/TRIM58/LAMC3/NEUROD1/TMEM91/ZNF804A/NKX6-1/EMX1/FAM163A/LRRC75B/B3GALT5/CLMP/AK5/ADAMTS2/TMEM54/FIBCD1/FOXD3/NKX6-2/LTK/ITPKA/GABRD/KCNQ2/ACE/BARX1/RAB6B/FSTL4/ANK1/LMO1/SCN5A/SLC2A13/POU2F3/HTR1D/NHLH2/TP73/BEX1/IRX4/CABP7/DRAXIN/ABLIM3/AFAP1L1/PDE1B/HOXD11/CH…
MARTENS_TRETINOIN_RESPONSE_UP	1.79444	0.000116842	ICAM1/PCSK1N/LIF/NUPR1/C2CD4C/IL32/COL16A1/GDF15/ELFN2/HPCAL1/ADAMTS8/LMX1B/TMIE/TMEM59L/ZNF467/MFNG/VAX1/PCDH8/APLP1/DHRS2/ERFE/CHAC1/REEP2/KCNC4/LAMC3/KCNK9/LAMB3/SOX8/PAX5/CYP26B1/NKX6-1/ZNF749/EMX1/FOXD1/FSCN3/SHB/SLC6A12/DRD2/CACNA1H/ADAMTS2/MYO7A/G0S2/SMTNL2/TRIM46/PCDHA1/HMCN2/PARD6A/KLK8/SNCB/DMKN/SOWAHD/COL1A1/SH2D5/TNNI3/ACE/ATP1A3/BARX1/PCDH1/APOC1/B3GNT8/HOXC13/LMO1/SCN5A/JAG2/MMP15/S…
REACTOME_NONSENSE_MEDIATED_DECAY_NMD	2.08418	0.000116842	UPF3B/RPL37/RPS27/RPL36A/RPL22L1/UPF1/RPL12/RPS29/RPL24/RPL34/RPL27/RPL31/RPL39/RPL39L/RPS28/SMG9/RPL10A/RPL37A/RPS12/UPF3A/RPL21/RPL36/RPS17/RPLP2/MAGOHB/RPS14/RPS21/RPL26/RPL38/RPS15A/RPS18/RPL41/RPS23/RPS27L/RBM8A/RPL17/UPF2/RPL32/RPS26/RPL22/RPL23/RPS13/RPS25/UBA52/RPL9/RPS11/FAU/RPS15/RPS19/RPL11/RPS27A/RPL30/RPL35A/RPL7/RPL28/RPL35/RPLP1/RPS8/RPL13/RPL23A/RPS20/RPL14/RPS24/RPS7/RPL18/RPS6/R…
WHITFIELD_CELL_CYCLE_G2_M	-1.94616	0.000152438	BIRC5/CCNB2/ITPR1/JADE2/PTPN9/CDC27/CENPE/TMEM138/INPP5K/MIS18BP1/MZT1/NCOA5/SS18/ATXN1L/CKAP5/HP1BP3/HMG20B/NDE1/CENPA/SMTN/G2E3/KMT5A/PIK3CD/TXNRD1/CNN2/CCNA2/SLC44A2/HPS4/TTK/TRIP13/HMMR/GTSE1/BUB1/CREBRF/MCM4/POM121/PRR11/TPX2/CDC25B/CNTROB/NUP35/VANGL1/QRICH1/GPSM2/MKI67/LPP/PPP1R10/SPAG5/SHCBP1/CDCA3/HSPA13/NUP98/DEPDC1B/LBR/RANGAP1/DLGAP5/HCFC1/PCF11/ARHGAP19/BUB1B/CTNND1/DEPDC1/ARL6IP1/CC…
MITSIADES_RESPONSE_TO_APLIDIN_DN	-1.769	0.000579857	KIAA0100/SUGP2/HNRNPR/IPO5/IQGAP1/TMEM97/CCNA2/CD9/MAGED1/TEX2/KIF18B/SF3B1/TRAM2/TRIP13/GINS1/NDC1/PGAM1/SLC38A2/PSMD2/FAM20B/NSDHL/BUB1/MCM4/TPX2/TOP2A/MTMR4/LPCAT1/NBPF14/SCD/MYC/PPAT/ADD3/PDS5B/UBE2G2/CDCA8/CLTC/EIF4G1/MKI67/IMPDH1/SKP2/ERCC6L/SHCBP1/NF2/TUBB/CERK/SLC5A3/LBR/RACGAP1/DLGAP5/ZC3HAV1/ASPM/ACLY/HCFC1/NUP188/ARHGAP19/NCAPD2/BUB1B/AGPAT5/CCNB1/HJURP/RNGTT/TOPBP1/GCN1/MBNL1/TACC3/SP…
REACTOME_HSF1_DEPENDENT_TRANSACTIVATION	-2.21516	0.000579857	HSPH1/SERPINH1/HSP90AB1/HSPA2/DNAJB1/HSPA8/HSPA1B/HSPA1A/HSPA6
REACTOME_CELLULAR_RESPONSE_TO_STARVATION	1.94232	0.000579857	DDIT3/ATP6V1G2/CEBPB/TRIB3/CEBPG/ASNS/ATP6V1E2/RPL37/RPS27/RPL36A/ATF4/RPL22L1/RPL12/RPS29/RPL24/RPL34/RPL27/RPL31/RPL39/RPL39L/RPS28/ATF3/RPL10A/RPL37A/RPS12/EIF2S2/RPL21/RPL36/RPS17/RPLP2/MIOS/RPS14/RPS21/RPL26/RPL38/RPS15A/RPS18/ATP6V0D2/RPL41/RPS23/RPS27L/RPL17/RPL32/RPS26/RPL22/RPL23/RPS13/RPS25/UBA52/RPL9/RPS11/FAU/RPS15/RPS19/RPL11/RPS27A/SESN2/RPL30/RPL35A/RPL7/RPL28/RPL35/RPLP1/RPS8/RPL1…
REACTOME_RESPIRATORY_ELECTRON_TRANSPORT	2.01865	0.000579857	MT-ND3/MT-ND1/COX19/NDUFAF2/NDUFA3/NDUFB1/COX16/COX6C/SURF1/NDUFAF4/UQCRB/MT-ND4/NDUFB3/COX20/NDUFV3/MT-ND2/NDUFB9/NDUFA11/NDUFA6/UQCR11/MT-CO2/MT-ND6/CYC1/TACO1/COX7C/MT-CO3/UQCRQ/NDUFA13/UQCRH/COX6B1/COX6A1/ETFB/MT-CYB/NDUFA2/NDUFS4/COX5A/COX5B/COX7B/COX8A/NDUFAF6/NDUFS7/NDUFB4/NDUFS6/NDUFA1/NDUFA12/NDUFB5/NDUFC1/UQCR10/COX4I1/NDUFB11/NDUFS5/COA1/NDUFA7/NDUFA8/TMEM126B/TMEM186/NDUFC2/COX14/MT-N…
DEBIASI_APOPTOSIS_BY_REOVIRUS_INFECTION_DN	-1.7369	0.000579857	SKIV2L/ADD2/ITPR1/PRMT2/THRA/ATP2A2/FLNC/MAP4/NDUFAF1/GPC1/MAPKAPK3/ATP7B/INTS1/COL4A6/POR/ZFC3H1/ATR/GNS/LAMB2/MAPRE2/NAGA/SRGAP2/SLC38A10/AQR/CAD/DBN1/GLB1L2/FIG4/KIAA0100/PCDH7/RNFT2/FLNA/CD9/ESYT1/HEXIM1/KDM5C/MAGED1/CAPN1/ERBB2/POLG/WFS1/MYO9B/ADAM17/TUBB4A/IPO13/PI4KB/PRAME/FBN2/PMPCA/ALDH1B1/PFAS/SLC5A6/ABCA2/DHCR7/FSCN1/HSPA12A/MGAT5/MYOM2/ATG2A/B4GAT1/PTK7/TRIM16/IGSF3/LPCAT1/MYC/POLR2A/…
REACTOME_REGULATION_OF_EXPRESSION_OF_SLITS_AND_ROBOS	1.90819	0.000884315	ROBO2/PSMB9/UPF3B/RPL37/RPS27/RPL36A/RPL22L1/LHX2/ROBO3/RPL12/RPS29/RPL24/RPL34/RPL27/RPL31/RPL39/RPL39L/RPS28/RPL10A/RPL37A/RPS12/UPF3A/RPL21/RPL36/RPS17/RPLP2/MAGOHB/RPS14/RPS21/RPL26/RPL38/RPS15A/RPS18/RPL41/RPS23/RPS27L/RBM8A/RBX1/RPL17/UPF2/RPL32/RPS26/RPL22/RPL23/RPS13/RPS25/UBA52/RPL9/RPS11/FAU/RPS15/RPS19/LDB1/LHX4/RPL11/RPS27A/RPL30/RPL35A/RPL7/RPL28/RPL35/RPLP1/RPS8/PSMB10/RPL13/RPL23A/…
BHATI_G2M_ARREST_BY_2METHOXYESTRADIOL_DN	2.05221	0.00092467	NUPR1/GFI1/GPT2/MACROD1/TRIB3/IFRD1/BAG1/MT1F/LENG1/B3GALT6/CEP104/CEBPG/ZBED3/C5/SIRPA/CIRBP/RPL36A/ATF4/RPL12/KRCC1/RPL34/AK7/MYL5/ZFAND1/RPL31/SPSB2/ARHGAP9/CRTAP/RPL10A/LARP6/PRKCZ/CTH/RPS17/PGLS/ARHGAP24/RPL26/SNAPC5/TCF7L1/CCNB1IP1/PSAT1/ELAC1/SESN2
GABRIELY_MIR21_TARGETS	-1.68493	0.00101405	SFXN1/STAT3/IPP/SMC1A/ZNF367/ETNK1/FILIP1L/GLCCI1/B3GALNT1/FBXO11/USP47/ZNF286A/ANKRD28/CEP97/RNF38/SNX13/EIF2AK3/GAPVD1/GNE/KLF5/KLHL24/DYNC1LI2/EXOC5/LATS1/WNT5A/PRRC1/PTBP3/TRIM38/EXOC8/LPIN1/NAA30/RSPRY1/TNRC6B/GPD2/KBTBD6/PHIP/WNK3/TOP2A/ZYG11B/ATF2/MGA/PDCD4/ATP2B4/NIPBL/PIK3C2A/UGGT1/AGO4/LIN7C/ZMYM2/CCT6P1/KBTBD7/MGAT4A/TBL1XR1/RFX7/B3GNT5/CAPRIN1/PAG1/REV3L/RP2/SKP2/PIK3R1/FBXO3/DDX3X/PL…
REACTOME_ATTENUATION_PHASE	-2.26987	0.00101405	HSPH1/SERPINH1/HSP90AB1/HSPA2/DNAJB1/HSPA8/HSPA1B/HSPA1A/HSPA6
HELLEBREKERS_SILENCED_DURING_TUMOR_ANGIOGENESIS	2.03324	0.0017307	ICAM1/IL32/CXCL1/P3H2/RELB/IGFBP7/CREB3L1/GADD45A/APOE/F2RL2/IER3/LRP1/CLIP3/FILIP1/ASS1
DAUER_STAT3_TARGETS_DN	-2.182	0.00181096	IFIT1/OAS1/HSPA1B/HSPA1A/HSPA6
SMIRNOV_RESPONSE_TO_IR_2HR_DN	-2.11326	0.00189865	RAB3GAP2/CCR6/TSPAN12/RAD54B/APAF1/MLH3/CENPA/KDM3A/ATP10D/KCNN3/ATF7IP2/PSRC1/CCNG2/SLC5A3/ST8SIA4/DEPDC1/MSMO1/JAK2/AURKA/TTC9/BCL2/KIF20A/HSPA1B/HSPA1A
BLANCO_MELO_BRONCHIAL_EPITHELIAL_CELLS_INFLUENZA_A_INFECTION_DN	2.0695	0.0026411	C4orf48/DHRS9/PDF/NUDT8/RDH14/PRR7/UBE2S/TBX1/ZNF524/YPEL3/SLC25A29/CCDC88B/TMEM160/B3GNT8/TJP3/SNCG/JUND/COMTD1/PPP1R14A/C15orf61/RPL39/MND1/ACBD4/E2F1/CCDC34/BSPRY/LIMD2
ZHANG_RESPONSE_TO_IKK_INHIBITOR_AND_TNF_UP	1.77601	0.00309353	ICAM1/LIF/IL32/CXCL1/SPSB1/BIRC3/PTX3/MMP13/TNFRSF9/CXCL2/IL23A/RELB/CEBPB/IL1R2/SGPP2/BTG1/SEMA7A/PAOX/ZNF697/LAMB3/DDIT4/RCAN1/G0S2/CCL5/TNIP2/LAMA2/RWDD1/LYN/NFKBIA/IFNGR2/NFKBIE/ISG20/DRAM1/GCH1/EFNA1/MARCKSL1/ATF3/NFKB2/OASL/NEDD4L/TRAF1/SNX9/CLIP4/MAST4/OAF/SAMD4A/TIAM2/TLE4/TNFAIP3/LACC1/LYPD3/PLAUR/C1orf74/RAB24
BHAT_ESR1_TARGETS_VIA_AKT1_UP	1.73002	0.00309353	GDF15/HPCAL1/CCDC3/PGR/VWF/C16orf74/TMEM120B/IGFBP4/DHRS2/DEGS2/STC2/IFRD1/SLC2A8/SH2D2A/LTBP3/AMZ1/SIAH2/BEGAIN/SHB/ATRIP/QSOX2/SLC1A4/BHLHE40/DUSP2/IER3/SEMA3B/CDC42EP1/SMTNL2/TRIM47/TMEM51/KCNK6/TBKBP1/CERS1/RNF144A/FAM207A/LETM1/PPIF/STK24/EFHD2/PAM16/GADD45G/LMO1/TJP3/LRFN4/GREB1/AKNA/XBP1/OVOL2/SLC10A3/RPP40/SRM/TOMM40/GPRIN1/REEP1/SNX24/PODXL/LONRF2/TGIF2/ATF3/NXT1/BRINP2/GPATCH4/PTGES/A4G…
MEISSNER_BRAIN_HCP_WITH_H3K27ME3	1.82958	0.00309353	ECEL1/GFI1/OTP/LMX1B/LARGE2/GSC/HMX1/GAL/ERFE/COL13A1/HELT/MESP1/TBX1/SALL4/SLC5A5/NKX6-1/WT1/CALCR/TMEM54/DMRT1/FOXD3/GJA3/LGR6/HOXA11/NTF4/SCARF2/FOXB1/BARX1/BNC1/HOXC13/PPM1N/VAX2/POU2F3/TP73/HOXB7/IRX4/DRAXIN/SLC44A3/HOXD11/CHRNA3/SPINT1/PRDM13/DMRTA1/MARCKSL1/NPAS1/HOXD13/HOXB9/GBX2/HOXD9/LBX2/DLX4/IRX6/TDH/NPY/SLC30A2/KCP/TFAP2C/HOXD8/KRT18/WNT2B/DMC1/SIX2/LOXL1/MMP2
MILI_PSEUDOPODIA_CHEMOTAXIS_DN	-1.54599	0.00309353	GNS/LAMB2/PSAP/SLC8B1/SPNS1/C20orf194/CPSF7/EPB41L2/NAGA/NOC2L/SEC61A1/SLC30A6/IGSF8/SLC38A10/EDEM2/SCPEP1/SERINC1/ZDHHC5/P4HA2/PDIA6/SGMS1/SLC2A1/TM2D3/COL4A1/SMG5/SPTLC1/USP14/APP/CD9/ESYT1/GALNT18/NEU1/SLC44A2/PDIA3/POLG/SERINC3/PLAT/SEMA3F/DIDO1/EIF2AK3/NDEL1/ZFYVE27/GRN/SLC16A1/SLC38A2/TM9SF1/TOR1B/C1R/IGF1R/PPIL2/SGPL1/SLC11A2/TUBGCP4/FAM171A1/PLOD1/SLC2A10/SLC39A14/ARHGAP17/ABCA2/SLC19A2/C…
REICHERT_MITOSIS_LIN9_TARGETS	-2.15832	0.00326888	CENPA/MYO6/HMMR/TOP2A/ANAPC1/MKI67/KIF23/CCNF/ASPM/NCAPD2/CCNB1/CDCA2/PLK1/AURKA/LMLN/VCPIP1/KIF20A
LINSLEY_MIR16_TARGETS	-1.6834	0.00330794	TVP23B/ARHGDIA/RFK/TFAP4/FAM189B/NAPEPLD/THUMPD1/MIEF1/RNH1/USP46/VPS33B/CBX6/DYNC1LI2/KIF1C/KIF3B/LIMK1/LAPTM4A/SLC11A2/ELL/ELK3/SLC9A1/CLASP1/NUP35/RNF128/FBXW7/BTRC/GOLGA1/LYPLA2/TMEM9B/M6PR/UHMK1/MKRN1/SUSD6/SLC25A22/COX10/KIF23/INTS5/SLC35A4/CARD10/MFN2/SPRYD3/NCEH1/LCOR/AGO1/MAPK1/ATG9A/SRPRA/IPPK/KLHL15/CDK6/DAZAP2/PUDP/BMT2/KBTBD4/ZNFX1/AREL1/ANKFY1/EPHA4/PHLPP2/ANLN/EFCAB14/HSPA1B
WP_ELECTRON_TRANSPORT_CHAIN_OXPHOS_SYSTEM_IN_MITOCHONDRIA	1.90382	0.00438165	MT-ND3/MT-ND1/NDUFA3/NDUFB1/COX6C/SURF1/UQCRB/COX7A2/MT-ND4/NDUFB3/NDUFV3/MT-ND2/MT-ND4L/NDUFB9/NDUFA6/UQCR11/MT-CO2/MT-ND6/COX7C/MT-CO3/UQCRQ/UQCRH/COX6B1/COX6A1/MT-CYB/NDUFA2/NDUFS4/COX5A/COX5B/COX7B/COX8A/NDUFS7/NDUFB4/NDUFS6/NDUFA1/NDUFA12/NDUFB5/NDUFC1/UQCR10/COX4I1/NDUFS5/COX17/NDUFA7/NDUFA8/NDUFC2/MT-ND5/NDUFA4/NDUFB10/NDUFB8/MT-ATP6/NDUFA5/NDUFB2/NDUFS8/MT-CO1
BILANGES_SERUM_AND_RAPAMYCIN_SENSITIVE_GENES	1.96753	0.00516627	KCNK13/PTMS/RPL36A/RPL24/SPRY2/RPL21/RPS17/RPS14/RPL26/RPS23/RPL32/RPL23/RPS13/RPS25/UBA52/USE1/FAU/RPS19/RPS27A/RPL30/RPL7/RPL28/RPS8/RPL13/TPT1/RPL14/RPS24/RPS7/RPL18/RPS6/RPS3/RPL18A/RPS10/RPS3A/EIF3M/RPL10/RPL6/RPS9/RPL27A/RPS16/RPS5/SIN3B/RPL5/EEF1B2/RPL8/RPL29/EIF3H/RPL13A/RPS4X/RPL7A
WEST_ADRENOCORTICAL_TUMOR_UP	-1.58869	0.00520243	EPB41L4B/FGFR4/HOXA9/NEK2/ZWILCH/CDK17/CAPZA1/JAG1/PSMD11/TMEM30A/GPR89B/PRDM4/PTTG1/TMPO/ZBTB43/ANXA4/RRM2/STOM/TUBB2A/ACTR2/MAPRE1/MVK/NOL8/SLC25A24/ZMPSTE24/CCT6A/DNAJB6/CNOT8/CAD/ELMO2/MTF2/P4HA2/FAM32A/SPTLC1/TMEM97/USP14/NEU1/KIF18B/NNT/SLC31A2/ANKHD1/MYO9B/SLC36A1/GAPVD1/HSD17B7/SLC16A1/SLC1A3/TMEM41B/XPO1/SC5D/NRAS/TPD52L2/TUBA1B/BUB1/JAKMIP2/PI4KB/FBN2/FDFT1/LPIN1/SLC35D1/CD164/TPX2/CLIN…
BENPORATH_PRC2_TARGETS	1.59828	0.00520243	DSCAML1/KCNA3/RPRML/CHRD/ECEL1/ADARB2/PTHLH/NRG1/OTP/RIMBP3C/KCNK13/FLRT2/LMX1B/ANXA2R/TMEM59L/SLC1A2/KCNMA1/PGR/GSC/COMP/DOK6/DUOX1/SGPP2/ZFYVE28/VAX1/PXMP2/PCDH8/EPHB3/FOXG1/HS6ST3/SLC10A4/KCNC4/MESP1/TBX1/SLCO2A1/HOXD3/TTYH1/NEUROD1/CYP26B1/BHLHE41/CACNA1B/NKX6-1/FAM163A/HRK/RIMBP3/DLL4/TLL1/TRADD/WT1/ARHGAP20/CD8A/DMRT1/SLC1A4/CD70/ESAM/FOXD3/NKX6-2/LTK/RIMKLA/ITPKA/LGALS3/HOXB2/IRX5/FOXB1/SH…
REACTOME_HSF1_ACTIVATION	-2.13534	0.00531091	HSPH1/SERPINH1/HSP90AB1/DNAJB1/HSPA1B/HSPA1A/HSPA6
MARTORIATI_MDM4_TARGETS_FETAL_LIVER_DN	-1.49339	0.00546656	PPP4R1/ST13/TIA1/CDC27/DDX17/KIF15/RCBTB1/S1PR3/SLC44A1/TNFAIP1/CTTNBP2NL/LYPLA1/NONO/SLC13A4/AGPS/CASP9/CBX2/CSTF3/PCYT1A/ACTR2/HP1BP3/MAPRE1/PPM1B/SHC1/ABCF2/METTL16/PSAP/EPB41L2/GLYR1/KIF11/MATR3/PLPP3/USP19/FYTTD1/GNA12/HMG20B/LHX9/TNC/CAD/KCTD20/LRRC58/MAPK1IP1L/MARK2/MBD1/SMC1A/STARD4/STAU1/PDIA6/QKI/RBBP9/SCYL2/ZMYND11/FAM32A/GPBP1/MECOM/SMARCA5/TSHZ1/ZNF830/AP1G1/ATP11C/HEXIM1/NOLC1/PJA2/…
DOUGLAS_BMI1_TARGETS_DN	-1.60598	0.00562894	BPGM/DCAKD/ICAM2/SERINC3/ELMOD2/NKIRAS2/DIDO1/KLHL24/LANCL1/PCMTD1/RNF168/ARNTL/TOR1B/VEZT/ATP10D/CTSD/PAN2/IRF9/PDE1A/MFSD1/RASA1/DNAJC16/SARAF/RARB/C18orf25/PLSCR4/DCAF12/API5/ATP6V0D1/CPEB4/LIN7C/AZIN1/M6PR/ANAPC1/COL3A1/LPP/PAG1/SKP2/UBE4B/TMED8/EXD2/TBC1D13/SNRK/KPNA6/MVP/RBM47/PIP4K2C/CCNG2/CLCN3/GNPDA1/SLC33A1/IL1RAP/SHPK/SPRYD3/RAB8B/SLC20A2/ARHGAP19/RAPGEF2/SLC10A7/GOLGA3/ZFYVE26/RAP2C/C…
KEGG_ANTIGEN_PROCESSING_AND_PRESENTATION	-2.02855	0.00598462	HSPA4/CALR/HSPA5/CANX/HSP90AB1/KLRD1/NFYA/HSPA2/HSPA8/HSPA1B/HSPA1A/HSPA6
WP_STEROL_REGULATORY_ELEMENTBINDING_PROTEINS_SREBP_SIGNALLING	-1.96419	0.00616612	MBTPS2/PRKAG2/CREB1/FASN/MTOR/PIK3CA/SCARB1/SP1/NR1H2/SEC24A/AMFR/FDFT1/LPIN1/SEC24D/SREBF2/SCD/LSS/ACLY/PPARGC1B/SEC23A/IDI1/SQLE/MBTPS1/SEC24C/NFYA/HMGCS1/SEC31B/INSIG1/HMGCR/LDLR
ODONNELL_TFRC_TARGETS_DN	-1.88272	0.00640774	CFL2/KIF4A/BIRC5/CENPE/NUP50/DNA2/NFIA/RRM2/RAD54B/KIF11/CENPA/LRRC58/KBTBD8/CCNA2/B4GALNT3/TTK/ACVR2B/HMMR/GTSE1/BUB1/TOP2A/LIN28B/MON2/SCD/MKI67/FAM72C/ANKRD50/ERCC6L/ZBTB6/CDC20/CKAP2L/SHCBP1/G3BP1/DEPDC1B/DLGAP5/ASPM/HSPH1/BUB1B/DEPDC1/CCNB1/ARHGAP11A/TACC3/PLK1/AURKA/ECT2/TFRC/KIF14/ANLN/FAM83D/KIF20A
REACTOME_ACTIVATION_OF_THE_MRNA_UPON_BINDING_OF_THE_CAP_BINDING_COMPLEX_AND_EIFS_AND_SUBSEQUENT_BINDING_TO_43S	1.86281	0.00763348	EIF4EBP1/RPS27/RPS29/RPS28/RPS12/EIF2S2/RPS17/RPS14/RPS21/RPS15A/RPS18/RPS23/RPS27L/RPS26/RPS13/RPS25/RPS11/FAU/RPS15/RPS19/RPS27A/RPS8/RPS20/RPS24/RPS7/RPS6/RPS3/RPS10/RPS3A/EIF3M/RPS9/RPS16/EIF3D/RPS5/RPS2/EIF2S1/EIF3K/EIF3H/RPS4X/RPSA
SCHMIDT_POR_TARGETS_IN_LIMB_BUD_UP	-2.12889	0.00763348	SC5D/NSDHL/FDFT1/DHCR7/SREBF2/LSS/ACLY/CYP26A1/IDI1/MSMO1/SQLE/ELOVL6/HMGCS1/INSIG1/LDLR
KEGG_STEROID_BIOSYNTHESIS	-2.10735	0.00763348	HSD17B7/SC5D/NSDHL/FDFT1/DHCR7/LIPA/LSS/CYP27B1/MSMO1/SQLE/DHCR24
SENESE_HDAC1_TARGETS_UP	-1.49006	0.00886159	TAOK1/TNFRSF10B/DUSP7/GLYR1/SEC61A1/DCTN5/MYH16/USP10/ERRFI1/LRRC58/MYO6/CYP1A1/KBTBD8/PRIM2/SCYL2/TEAD1/HACD2/IQGAP1/POMGNT1/ARHGDIA/GPAT3/RRN3/ASPH/MSANTD4/MTMR2/SERINC3/SF3B1/SNAP23/PDE4DIP/ETS1/NXT2/DOCK4/NSMAF/SLC16A1/EXOC5/FBXO38/FBXW11/GPCPD1/MAFF/YWHAZ/ANAPC5/BACH1/KPNA4/BUB1/FKBP15/PTBP3/SLC39A14/TRIM38/ZC3HAV1L/ELK3/MCM4/SGPP1/STK26/LIG4/MFAP3/WDR6/G3BP2/ITPRIP/NFS1/PHTF2/PIK3C2A/SMG7/C…
YAO_TEMPORAL_RESPONSE_TO_PROGESTERONE_CLUSTER_13	1.73979	0.0095285	RELB/SNX10/EIF4EBP1/CSRP1/LGALS1/SEC61G/MRPL52/PIGX/PDCD5/IFNGR2/NAB1/HNRNPL/NDUFA3/LSM3/SSNA1/DNAJC15/PQBP1/COX16/ROMO1/DAP/ACYP2/POLR3K/COMMD1/MRPL35/UQCRB/COA6/NDUFV3/B9D1/UQCR11/LAGE3/TAF9/PSAT1/DYNLRB1/VPS29/NDUFA13/DGCR6L/NAA38/TXNDC17/SNRPE/EMC6/GSR/RPP30/COX6A1/ETFB/NDUFA2/PSMG4/COX5B/MRPS33/COX7B/ESD/GSTM3/SNRPG/DAP3/LSM8/GTF2A2/MRPS18A/ANXA1/GPX4/TMEM205/FKBP3/NDUFB5/NDUFC1/POLD3/UQCR10…
PHONG_TNF_TARGETS_UP	1.96658	0.00975097	ICAM1/LIF/CXCL1/BIRC3/PTX3/CXCL2/BTG1/DUSP8/LAMC2/BHLHE40/IER3/DUSP1/NFKBIA/IFNGR2/ETS2/ATF3/NFKB2
MCLACHLAN_DENTAL_CARIES_UP	1.82077	0.0110355	ICAM1/CXCL1/BIRC3/CFI/FGL2/SFRP4/IGFBP4/ABCA1/C3/IRF4/PAX5/APOE/G0S2/IL13RA1/SLC1A4/IER3/MGP/MZB1/CCL5/LSP1/PECAM1/PLA2G7/LYN/APOC1/CFD/STAB1/HLA-DRA/REEP1/FCGR2A/VAMP8/TNFRSF1B/MMP9/CD44/MSR1/ALOX5/TNFAIP3/IGFLR1/PLAUR/RAB31/PLAC8/RGS2
REACTOME_HSP90_CHAPERONE_CYCLE_FOR_STEROID_HORMONE_RECEPTORS_SHR	-1.96751	0.0127279	TUBB4B/HSP90AB1/DNAJA1/TUBA1C/HSPA2/DNAJB1/TUBA8/HSPA8/HSPA1B/HSPA1A
REACTOME_RESPONSE_OF_EIF2AK1_HRI_TO_HEME_DEFICIENCY	1.98102	0.0131852	DDIT3/CEBPB/TRIB3/CHAC1/CEBPG/ASNS/ATF4/ATF3/EIF2S2/PPP1R15A
CHICAS_RB1_TARGETS_LOW_SERUM	1.84248	0.0131852	C4orf48/SERPINB8/EGFR/INHBE/TYMS/ZYX/EIF4EBP1/MT1F/RPL36A/NDUFA3/LMNB1/UQCC2/RPS28/CKLF/NDUFB1/SEC62/RAB27A/ROMO1/RPA3/RPS21/RPL38/WDR76/CDT1/TOMM7/POLR2L/UQCR11/LSM7/PET100/COX7C/HELLS/SNRPE/AAK1/COX6B1/SOX4/SLC7A14/COX5B/RNASEH2A/MT2A/SNRPG/ATOX1/RPL36AL/PITX1/NDUFB4/OST4/TMEM258/NDUFA1/SYNE2/COPS9
KEGG_PHENYLALANINE_METABOLISM	-2.01965	0.013586	MAOA/MAOB/ALDH1A3/AOC2/AOC3/ALDH3B1
NABA_SECRETED_FACTORS	1.76636	0.013586	LIF/CHRD/TNFSF4/CXCL1/NRG1/GDF15/EGF/CXCL2/SFRP4/IL23A/IGF1/TGFB2/FGFBP3/INHBE/S100A4/TPO/ANGPT1/XCL1/CCL5/FGF11/NTF4/GDF9/PIK3IP1/WNT5B/FGF7/VEGFB/C1QTNF9B
GHANDHI_DIRECT_IRRADIATION_UP	1.92196	0.0138726	LIF/CXCL1/BIRC3/GDF15/PRDM1/CXCL2/RELB/LAMB3/CYP26B1/SLC16A6/BBC3/LAMC2/GADD45A/G0S2/DUSP2/TESC/HIP1/MYBL1/RGS9/GCH1/ANKRD20A1/CREB5
BLANCO_MELO_COVID19_SARS_COV_2_INFECTION_A594_CELLS_UP	1.95327	0.0141211	ICAM1/PTX3/DDIT3/TNFRSF9/ADM2/ARRDC4/ABCA1/CHAC1/STC2/INHBE/N4BP3/TSC22D3/LAMC2/GREM1/RAB39B/RASGRF2/CCL5/PCDH1/FUT1/BEX2/ALDH1L2/CDH3/ATF3
REACTOME_SIGNALING_BY_PDGF	-1.94591	0.0149551	NCK1/STAT3/COL6A1/COL4A1/PIK3CA/PLAT/SOS1/NRAS/RASA1/CRKL/COL4A5/COL4A2/COL3A1/PIK3R1/THBS3/PDGFC/PDGFRA/PDGFD/COL5A2/COL2A1/COL9A1/PIK3CB/THBS2/COL4A4/COL5A1/COL4A3
BLANCO_MELO_COVID19_SARS_COV_2_INFECTION_CALU3_CELLS_UP	1.66625	0.0149551	ICAM1/NUPR1/C11orf96/BIRC3/PTX3/MMP13/PRDM1/TNFRSF9/CXCL2/IL23A/DUOX1/ARRDC4/SEMA7A/IFI16/CHAC1/BEST1/STC2/INHBE/SLC5A5/DUSP8/NLRP1/RASGRP3/SLC16A6/BBC3/GADD45A/ADAMTS6/G0S2/CCL5/KLF9/C1QTNF1/PCK2/ANKRD1/DDX60L/ASNS/LAMA2/DUSP1/NFKBIA/OAS3/PMAIP1/SP8/FUT1/BATF2/RBM43/DDX60/AKAP12/IL15RA/ISG20/HSD17B14/CREB5/ALDH1L2/NR1D1/SPRY2/ATF3/SP100/OASL/OTUD1/CTH/GBX2/PPP1R15A/HMGN2P46/TRAF1/KIF6/PPP4R4/STX…
REACTOME_COMPLEX_I_BIOGENESIS	1.94728	0.0152107	MT-ND3/MT-ND1/NDUFAF2/NDUFA3/NDUFB1/NDUFAF4/MT-ND4/NDUFB3/NDUFV3/MT-ND2/NDUFB9/NDUFA11/NDUFA6/MT-ND6/NDUFA13/NDUFA2/NDUFS4/NDUFAF6/NDUFS7/NDUFB4/NDUFS6/NDUFA1/NDUFA12/NDUFB5/NDUFC1/NDUFB11/NDUFS5/COA1/NDUFA7/NDUFA8/TMEM126B/TMEM186/NDUFC2/MT-ND5/NDUFB10/NDUFB8/NDUFA5/NDUFB2/NDUFS8/NDUFAF3/NDUFB7/ECSIT
SMID_BREAST_CANCER_RELAPSE_IN_LUNG_DN	1.96674	0.0162071	RAPGEF3/DNALI1/SFRP4/IGF1/COMP/PPP1R1A/PRODH/LMOD1/NAT1/LRRN3/SLC1A1/ABCA8/CXCL14
PACHER_TARGETS_OF_IGF1_AND_IGF2_UP	1.8946	0.0163479	GDF15/DDIT3/IGF1/PCDH8/INHBE/IFRD1/GADD45A/SLC1A4/BHLHE40/ASNS/RPRM/ASS1/SLC3A2/PSPH
WP_MITOCHONDRIAL_COMPLEX_I_ASSEMBLY_MODEL_OXPHOS_SYSTEM	1.91245	0.017518	MT-ND1/NDUFAF2/NDUFA3/NDUFB1/NDUFAF4/MT-ND4/NDUFB3/NDUFV3/MT-ND2/MT-ND4L/NDUFB9/NDUFA6/MT-ND6/NDUFA13/NDUFA2/NDUFS4/NDUFAF6/NDUFB4/NDUFS6/NDUFA1/NDUFA12/NDUFB5/NDUFC1/NDUFB11/NDUFS5/COA1/NDUFA7/NDUFA8/TMEM126B/TMEM186/NDUFC2/MT-ND5/NDUFB10/NDUFB8/NDUFA5/NDUFB2
REACTOME_TRANSLOCATION_OF_SLC2A4_GLUT4_TO_THE_PLASMA_MEMBRANE	-1.92096	0.017518	MYO1C/EXOC4/EXOC7/RAB4A/MYO5A/STXBP3/C2CD5/PRKAG2/TUBB2A/SLC2A4/EXOC2/YWHAQ/SNAP23/TUBB3/EXOC1/TUBB4A/EXOC5/KIF3B/YWHAZ/TUBA1B/EXOC8/TUBB6/AKT2/LNPEP/ACTB/TUBB4B/TUBA1C/RALGAPA2/ACTG1/TUBA8
REACTOME_EXPORT_OF_VIRAL_RIBONUCLEOPROTEINS_FROM_NUCLEUS	-1.98839	0.0188834	NUP62/SEH1L/NUP85/NDC1/XPO1/NUP214/POM121/RANBP2/NUP35/NUP153/NUP98/NUP188/NUP58/POM121C/HSPA1A
GARY_CD5_TARGETS_DN	-1.46224	0.0205487	RRM2/THADA/CCNE2/CEBPZ/HLA-DPA1/PIGW/ABCF2/ATR/CCT6A/CSTF2/DNAJB6/GFM1/NUP133/PLAA/SRSF11/BZW1/DNAJC10/FEN1/RINT1/WDR36/USP6NL/WWP1/ZNF367/CNOT4/KBTBD8/PDIA6/SGMS1/CDK12/CUL2/IPO5/NCBP1/ANAPC7/ATP6V1C1/ERAP1/NOLC1/ZBTB24/GNL3L/MSANTD4/UHRF1/ZNF207/ZNF451/ETS1/FOXO1/MAP3K7/OTUD6B/SERTAD2/GINS1/LCMT2/PPP4R3B/TM2D2/MGAT2/PDP2/SEPHS1/ILF3/LARS2/PAN2/RLIM/SLC11A2/FRMD8/SLC30A7/FAM98A/IPO11/KPNA2/PMPCA…
ENK_UV_RESPONSE_EPIDERMIS_DN	-1.39165	0.0206902	UVRAG/ZNF207/ABCD3/ADAMTS1/EIF2AK3/NDEL1/PFKFB3/ADAP2/ARNTL/EPHB6/GAN/RPS6KB1/CSNK2A2/CYP39A1/HIVEP2/KDM6A/LEMD3/BCL10/CRY1/KPNA4/LZTFL1/PTBP3/DCP1A/NECTIN2/SLC1A6/TMEM50B/TSC2/DHX8/INPP5A/KCNK1/NPAT/FSCN1/F2R/PDCD4/GMEB1/PIGN/RIPK4/TRIM16/UBAP1/ACSBG1/F2RL1/INSR/ITGA2/STK17B/PBX3/SART3/SPINK5/ZNF331/BCL11B/E2F6/SATB1/LPP/TGFBR3/ATP7A/WDR1/DNAJB4/SLC20A1/ELL2/HIF1A/PLD1/BRD3/CLDN1/PTPRF/LSS/TIMP2…
KRIGE_AMINO_ACID_DEPRIVATION	1.99795	0.0217422	DDIT3/CEBPB/TRIB3/CHAC1/STC2/DDIT4/GADD45A/ASNS/ASS1/ATF3/CTH/PPP1R15A/PSAT1/SESN2
YANG_BCL3_TARGETS_UP	-1.48581	0.0232691	ABCC9/AXIN2/CXADR/IRF7/MME/TBL1XR1/ACSL3/MKI67/NID2/TGFBR3/CDC20/PPRC1/CDCA3/RBM47/LIPE/RACGAP1/DLGAP5/ZNF23/EPHA3/RXRG/VWA1/CCNB1/STAT2/ARHGAP11A/ITGA8/SLC7A8/CDCA2/ANKRD13C/CRB3/ELOVL6/SAPCD2/TACC3/SCN4B/AURKA/NPY1R/ECT2/TGFB3/HUNK/ESPL1/THBD/IFIT2/DGKG/MYH3/FAM83D/SEMA3D/KIF20A/DHX58/MASP1/OAS1/UBA7/IGSF10/HPX/TF
MEISSNER_NPC_HCP_WITH_H3_UNMETHYLATED	1.54285	0.0234885	GRIN2A/EVA1B/DBX2/BIRC3/KCNK13/CALN1/LARGE2/OLFM2/SH3D21/ABCG4/TMEM59L/LOXL4/DUSP9/DUSP26/GAL/PRRT3/IGFBP6/RIPPLY3/TRIM58/HEBP1/HTRA3/LAMC3/SLCO2A1/SPTBN4/KCNK9/SLC6A11/SLC5A5/SYCP3/FAM163A/CLVS2/LAMC2/SCARA3/AARD/LEKR1/WT1/TMEM54/SPEG/RASGRF2/SYCE2/NOX4/TRIM47/NPY5R/KLK8/DCDC2/GYPC/LGALS3/MESP2/SCARF2/SOWAHD/CHCHD10/BTBD11/B3GNT8/FBRSL1/MAL2/MCUB/KBTBD12/TMCO4/ASS1/RBM43/RIN3/ARHGEF4/DPP6/SHROOM…
PECE_MAMMARY_STEM_CELL_UP	1.76047	0.0234885	LAMB3/MT1F/APOE/MGP/SEC61G/CLTB/RPS29/RPL24/RPL39/RPS28/RPL10A/RPS12/RPLP2/COX6C/RPS14/RPS18/RPL41/UQCRB/COX7A2/TMA7/RPS26/RPL22/RPS13/RPS19BP1/RPS25/UBA52/NDUFA11/NDUFA6/UQCR11/TMSB10/EDF1/FAU/NACA/RPS19/C9orf16/PET100/OXLD1/DLL1/RPL35A/KRT8/RPL28/RPLP1/RPL13/RPL23A/RPS20/RPS7/SOX4/TXN/AKR1C1/RPS3/MT2A/RPL18A/RPS10/RPL36AL/TRAPPC5/RPL27A/RPS16/COX4I1/DDT/HINT1/NDUFS5/MT1X/TIMM8B/PPIA/GNPTAB/RPS2…
REACTOME_METABOLISM_OF_AMINO_ACIDS_AND_DERIVATIVES	1.54829	0.0239354	GPT2/DUOX1/LIPT2/PXMP2/PAOX/SLC6A11/SLC5A5/PSMB9/SLC6A12/PIPOX/TPO/PSTK/RIMKLA/AMDHD1/ASNS/CKMT1A/AIMP1/HOGA1/PRODH/ASS1/ADO/GLS2/RPL37/RPS27/RPL36A/RPL22L1/SRM/RPL12/RPS29/PNMT/RPL24/RPL34/RPL27/SLC3A2/PSPH/RPL31/RPL39/MPST/RPL39L/RPS28/GAMT/RPL10A/RPL37A/RPS12/RPL21/CTH/FAH/GLUD1/RPL36/RPS17/HAAO/RPLP2/RPS14/RPS21/RPL26/RPL38/RPS15A/RPS18/CKMT1B/RPL41/RPS23/RPS27L/CHDH/RPL17/AIMP2/RPL32/PHGDH/R…
RIZKI_TUMOR_INVASIVENESS_3D_DN	-1.54912	0.02474	OLFM1/PTBP1/VDAC1/HSPA13/SRRT/SEC23IP/ESRRB/NUMA1/SOX30/COL2A1/GFM2/MBTPS1/SGK1/SORL1/PLK1/SEC24C/IKBKE/LAMA5/CYP2D6/COL4A4/SLC16A3/PLXNC1/EHD3/IL1R1/TRPM1/UBA7/SLC26A4/P2RX5/HSPA1A/HSPA6
REACTOME_REGULATION_OF_CHOLESTEROL_BIOSYNTHESIS_BY_SREBP_SREBF	-1.83153	0.0248901	NCOA2/ACACB/SP1/SEC24A/SC5D/FDFT1/DHCR7/SEC24D/SREBF2/SCD/TBL1XR1/LSS/MTF1/SEC23A/IDI1/SQLE/ELOVL6/MBTPS1/SEC24C/NFYA/HMGCS1/INSIG1/HMGCR
STARK_PREFRONTAL_CORTEX_22Q11_DELETION_DN	1.44905	0.0253219	TMEM59L/ARHGAP15/OCIAD2/SLITRK4/COPRS/C1QBP/EPM2AIP1/TMEM165/ZDHHC8/ARHGAP20/FNDC4/SDHAF4/EIF1/GABRD/ZNF511/MKKS/SCNM1/AIMP1/KDM1A/PRODH/PDCD5/RNF165/GLS2/IFNGR2/TMEM42/RPL36A/RPL22L1/C9orf85/TCEAL9/CRYZL1/RPL34/NENF/PFDN6/TMEM256/UQCC2/NIFK/SMIM4/HPF1/MCTS1/C19orf25/DNAJC15/SEC62/SLIRP/THOC7/U2AF1L4/ROMO1/RPS17/TXNL4B/RAD23B/SDHAF3/HCFC1R1/CEP19/RPL26/TMEM126A/EIF6/MZT2B/PCDH11X/TRMT10B/STRBP/CO…
KEGG_ENDOCYTOSIS	-1.5941	0.025687	PLD1/PIP5K1C/LDLRAP1/PDCD6IP/CXCR4/PARD6B/MET/NTRK1/CLTCL1/RAB5B/PDGFRA/EHD1/TFRC/PLD2/GIT1/EHD3/HSPA2/LDLR/HSPA8/HSPA1B/HSPA1A/HSPA6
MIKKELSEN_NPC_HCP_WITH_H3K4ME3_AND_H3K27ME3	1.67418	0.0263571	KCNA3/HS3ST3A1/NOG/ADAMTS8/KCNMA1/ZNF296/HMX1/PAQR9/BAIAP2L1/KIF5C/PCDH8/SEMA7A/KCNC4/HRK/DLL4/GNAL/PSMB9/AK5/ADAMTS2/GJA3/FGF11/NXPH4/FOXB1/BICDL1/CHRNA5/ABLIM2/CASZ1/STX3/CLDN23/AP3B2/SNTB1/TMEM181/NMNAT2/GCH1/FLT1/INA/HOXD13/A4GALT/KLHDC8A
JOHNSTONE_PARVB_TARGETS_1_DN	-1.83562	0.0271089	RBMS1/TNC/QKI/NPIPB5/GPAT3/ATP10D/UBA6/SEC24D/BICC1/ETV1/FAT1/STC1/DSE/LNPEP/NPIPB4/INSIG1/HSPA1B/HSPA1A
PID_AURORA_B_PATHWAY	-1.91173	0.0271089	KLHL13/BUB1/RASA1/PPP1CC/PPP2R5D/KLHL9/NSUN2/CDCA8/INCENP/KIF23/RACGAP1/EVI5/NCAPD2/AURKA/KIF20A
SMID_BREAST_CANCER_LUMINAL_B_DN	1.5231	0.0291595	ICAM1/ARHGAP25/IL32/CXCL1/L1CAM/BIRC3/PTX3/TMEM100/CD38/CFI/CXCL2/SFRP4/ALDH1A1/IGF1/IL1R2/GPR19/PPP1R1A/GAL/EXTL1/GALNT12/IFI16/EGFR/CHAC1/CHST7/C3/LAMB3/TTYH1/CYP26B1/CAPN6/NLRP1/RRAS2/MT1F/RCAN1/FNDC4/ANGPT1/MICALL1/MZB1/XCL1/CCL5/PECAM1/ANXA3/FBLN2/HACD1/LYN/MALL/BIN1/GABRE/PADI2/PDE9A/ENPP2/HBA1/SVEP1/ASS1/ID4/FBLN5/CSF2RA/HLA-DRA/PAMR1/ISG20/FBLN1/KLRK1/STEAP1B/STXBP6/YBX3/SOSTDC1/CDH3/NFKB…
CASTELLANO_NRAS_TARGETS_UP	1.83012	0.0291595	PTX3/PHLDA3/MMP13/IFI16/P3H4/TRIM11/IL13RA1/SDC1/MGP/LSP1/IFI27L2/ERCC5/CRIP2
SEKI_INFLAMMATORY_RESPONSE_LPS_UP	1.77363	0.0348925	ICAM1/LIF/CXCL1/BIRC3/BTG1/JDP2/EGFR/IER3/SLC4A7/NFKBIA/NFKBIE/GCH1/SCHIP1/NFKB2/TSLP/STX11/CD44/CSF1/PRRX1/GADD45B/ICOSLG/TNFAIP3
MARTORIATI_MDM4_TARGETS_FETAL_LIVER_UP	1.56442	0.0352783	P3H2/PHLDA3/LRRC32/SPAG17/VWF/JDP2/CHAC1/GRIP1/STC2/KCNE3/DDIT4/CCDC58/BHLHE41/EIF4EBP1/ZMAT3/ENHO/BHLHE40/IER3/PDK1/CIART/ZNF221/SAP30/SEC61G/RPRM/ZNF365/MAB21L3/PMAIP1/UPP1/DYNLL2/JAG2/PIK3IP1/RNF165/RAP2A/ZNF688/RPL34/LMNB1/PIGP/SOSTDC1/TMEM256/PITPNM2/RPS12/BLOC1S2/PLOD2/HOXB9/THEM6/RPS18/PRTG/COX7A2/NME4/PITPNC1/NDUFB9/LAGE3/LSM7/BOLA2B/HILPDA/PDE4B/SESN2/NSMCE1/IMMP1L
WP_PHOTODYNAMIC_THERAPYINDUCED_NFKB_SURVIVAL_SIGNALING	1.93689	0.0369719	ICAM1/BIRC3/CXCL2/RELB
SENESE_HDAC1_TARGETS_DN	1.57096	0.0377084	C11orf96/COL16A1/L1CAM/IRS1/ELFN2/P3H2/RHOBTB3/LOXL4/DNAJC1/GLIS2/TMEM120B/TGFB2/APLP1/DHRS2/TNS1/TTYH1/MATN3/NLRP1/SDC1/EFEMP2/NOX4/NUDT6/LSP1/COL11A1/LACTB/COL1A1/PKD2/SAMD1/CSDC2/PDE1C/MYBL1/CIRBP/DYNLL2/ASS1/ID4/BCAM/PTPRN/LYPD1/CRMP1/FBLN1/BCAR1/TCEA2/RNF187/MDP1/ZNF503
WP_OLIGODENDROCYTE_SPECIFICATION_AND_DIFFERENTIATION_LEADING_TO_MYELIN_COMPONENTS_FOR_CNS	1.89651	0.0381981	LIF/CXCL1/CXCL2/IGF1/SOX8/MYT1
REACTOME_GLYCOLYSIS	-1.82007	0.0416951	HK1/HK2/NUP54/ALDOA/NUP155/TPI1/ADPGK/GPI/NUP107/PFKP/NUP93/NUP160/NUP43/PKM/NUP205/NUP210/NUP50/PFKFB4/PGK1/NUP133/PFKFB2/PFKM/NUP62/SEH1L/BPGM/NUP85/PFKFB3/NDC1/PGAM1/PRKACB/NUP214/POM121/RANBP2/ALDOC/PPP2R5D/NUP35/NUP153/PPP2R1A/PPP2R1B/GNPDA1/NUP98/NUP188/NUP58/GAPDHS/POM121C
ONDER_CDH1_TARGETS_3_DN	1.94614	0.0426881	ARHGAP25/CYB5R2/CXCL1/PTHLH/SPAG1/CXCL2/IL1R2/ATP12A
HINATA_NFKB_TARGETS_FIBROBLAST_UP	1.75759	0.0426881	ICAM1/CXCL1/PTX3/RELB/EGFR/ANXA13/GADD45A/GREM1/G0S2/IER3/NFKBIA/MYBL1/ARF6/GCH1/NFKB2/MAPK9/CCNH/LRRN3/TNFAIP3/EXOSC9/MRPL33/RAC1/RABEP1/FGF2
PODAR_RESPONSE_TO_ADAPHOSTIN_DN	-1.9592	0.043246	FDFT1/DHCR7/SCD/CCNF/GLI2/IDI1/MSMO1/TFRC/ACTG1/INSIG1
CADWELL_ATG16L1_TARGETS_DN	-1.80001	0.0441168	VPS39/CAP1/SFRP1/FUBP1/NETO2/PER1/STOX2/SGK1/SATB2/SCART1/SLC15A2/HAL/HSPA1B/HSPA1A
SATO_SILENCED_BY_METHYLATION_IN_PANCREATIC_CANCER_1	1.50701	0.0462146	ICAM1/CYB5R2/IL32/BIRC3/GDF15/PTX3/GP6/KCNJ2/LRRC32/CABP1/CHAC1/C3/LAMB3/SLC6A11/PAX5/CYP26B1/EFHD1/TWIST1/SCARA3/SRPK3/ARNTL2/IER3/PDK1/EFEMP2/MICALL1/XCL1/TMEM51/CCL5/GYPC/ASNS/BARX1/FAM182B/RPRM/CLIP3/HOXC13/PMAIP1/SYN3/UPP1/HBA1/CLTB/GMFG/CDA/ARHGEF4/DNAJC6/MBNL3/SNTB1/SNAP25/AP4S1/ISG20/KLRK1/LHX2/ROBO3/ULK2/CDH8/SPINT1/CDH3/NR1D1/RPL39L/GAMT/NPAS1/PHC1/NFKB2/TRPV2/CBX8/SMARCA2/GALNT6/NEDD4L…
PID_PLK1_PATHWAY	-1.91577	0.0464947	FBXW11/RAB1A/BUB1/CDC14B/TPX2/CDC25B/PPP1R12A/PPP2R1A/INCENP/ERCC6L/CDC20/NINL/BUB1B/CCNB1/PLK1/AURKA/ECT2/KIF20A
DAZARD_RESPONSE_TO_UV_NHEK_DN	-1.46512	0.0464947	HMGXB4/MTMR6/TAF11/ZFC3H1/BCL7A/CCDC93/CUL1/UBL3/DUSP7/KIF11/NCK1/MLH3/CENPA/PHF3/SKAP2/USP6NL/ZHX2/CNOT4/EXPH5/QKI/NPIPB5/SHOC2/ZBTB24/FNBP1L/KDM5A/USP6/ZNF451/DIDO1/FOXO1/GAPVD1/GNE/SERTAD2/DOCK4/MED13L/XPO1/HIVEP2/WAPL/BACH1/IFI44L/HELZ/DST/NPAT/PHIP/CLASP1/TOP2A/ATF2/KAT6A/PPP1R12A/TIPARP/KLHL9/NUP153/LPCAT1/DMTF1/MYC/SART3/MKI67/SATB1/E2F3/LPP/REV3L/BRD8/CDKN1B/KIF23/PUM1/DTX2/FAT1/PPRC1/MEI…
WHITFIELD_CELL_CYCLE_G2	-1.59195	0.0474859	TMPO/VTA1/MIS18BP1/NCOA5/TUBB2A/CHEK2/HP1BP3/ARHGAP11B/C5orf49/KIF11/TTC38/FAN1/G2E3/ENTPD5/CCNA2/NCAPD3/KIFC1/DET1/WDR62/HIPK2/MGAT2/C2orf69/KPNA2/DHX8/TOP2A/ATL2/NIPBL/POLQ/STK17B/PIF1/BCLAF1/CDCA8/PSRC1/BRD8/CDKN1B/TNPO2/FAM72B/KIF23/ARHGEF39/CKAP2L/CDCA3/MID1/TUBB/CCNF/KBTBD2/LBR/NUMA1/RANGAP1/MET/ARHGAP19/TUBB4B/HJURP/CDCA2/SORL1/STIL/WSB1/SV2B/ESPL1/ANLN/FAM83D/HSPA2/DNAJB1
MANNE_COVID19_COMBINED_COHORT_VS_HEALTHY_DONOR_PLATELETS_UP	1.64265	0.0474859	CAPN12/C4orf48/TXNRD3/DDIT3/RELB/KIFC2/APLP1/MSRB2/OLFML2A/FNDC4/MZB1/PCGF2/GYPC/RNF144A/GADD45G/CASZ1/PIK3IP1/HBA1/TPRN/WNT5B/SRM/ORC5/EFNA1/NR1D1/SMIM4/TGIF2/NXT1/PLD6/CRELD2/FBXO32/LRRC2/MIIP/LMO4/NUDT14/P2RX4/ACACA/METRN/PPP6R2/HMBS/MRPL12/PPP3CC/ARL3/MAPK12
SMID_BREAST_CANCER_BASAL_UP	1.42917	0.0480703	ICAM1/PCSK1N/CYB5R2/IL32/CXCL1/L1CAM/PTX3/TMEM100/P3H2/TMCC2/CD38/IL1R2/GPR19/DUSP9/DUOX1/CHST11/UBE2S/GAL/EPHB3/EXTL1/GALNT12/IFI16/EGFR/CHAC1/BOP1/IFRD1/TYMS/LAMB3/S100A4/TTYH1/DDIT4/CYP26B1/CAPN6/GMDS/HRK/RRAS2/FOXD1/LAMC2/NFE2L3/ARNTL2/RCAN1/FNDC4/LZTS3/DMRT1/PDK1/ANGPT1/CDC42EP1/MICALL1/CCL5/KLK8/ANXA3/PDXK/ASNS/LOX/BARX1/HACD1/LYN/RAB6B/MALL/MYBL1/PADI2/PDE9A/UPP1/LRFN4/PPP1R14B/WNT5B/ID4/C…
WP_PROTEOGLYCAN_BIOSYNTHESIS	-1.91675	0.0480703	SLC26A2/SLC35B2/EXT1/XYLT2/EXTL3/XYLT1/CSGALNACT1
BIOCARTA_SHH_PATHWAY	-1.96664	0.0480703	PRKACB/PRKAR1B/GLI3/PRKAR2B/PRKAR1A/SUFU/GLI2/GLI1
GOBP_REGULATION_OF_ENDOPLASMIC_RETICULUM_STRESS_INDUCED_INTRINSIC_APOPTOTIC_SIGNALING_PATHWAY	0.989668	0.477419	DDIT3/LRRK2/CREB3L1/GRINA/PMAIP1/XBP1
GOBP_RESPONSE_TO_ENDOPLASMIC_RETICULUM_STRESS	0.74074	0.980271	NUPR1/DDIT3/LRRK2/CEBPB/TRIB3/GET4/EXTL1/CHAC1/TMUB1/CREB3L1/BBC3/DNAJC18/RASGRF2/PIGBOS1/ASNS/PLA2G4B/GRINA/PMAIP1/SERP2/FBXO2/TMEM129/USP13/XBP1/ATF4/MAP3K5
GOBP_INTRINSIC_APOPTOTIC_SIGNALING_PATHWAY_IN_RESPONSE_TO_ENDOPLASMIC_RETICULUM_STRESS	1.16139	0.251488	DDIT3/LRRK2/CEBPB/TRIB3/CHAC1/CREB3L1/BBC3/GRINA/PMAIP1/XBP1/ATF4/MAP3K5
GOBP_POSITIVE_REGULATION_OF_TRANSCRIPTION_FROM_RNA_POLYMERASE_II_PROMOTER_IN_RESPONSE_TO_ENDOPLASMIC_RETICULUM_STRESS	1.66177	0.0194974	DDIT3/CEBPB/CREB3L1/ATF4/ATF3
GOBP_REGULATION_OF_TRANSLATION_IN_RESPONSE_TO_ENDOPLASMIC_RETICULUM_STRESS	-0.867536	0.657216	NCK1/EIF2AK3/PPP1R15B/EIF4G1/DDX3X
REACTOME_ATF4_ACTIVATES_GENES_IN_RESPONSE_TO_ENDOPLASMIC_RETICULUM_STRESS	1.56252	0.0380779	DDIT3/CEBPB/CEBPG/ASNS/ATF4/EXOSC8/ATF3/EXOSC1/EXOSC4/EXOSC9/NFYB
GOBP_NEGATIVE_REGULATION_OF_RESPONSE_TO_ENDOPLASMIC_RETICULUM_STRESS	-0.846806	0.727003	SGTA/TMED2/TMBIM6/CLU/MAGEA3/BCL2L1/LPCAT3/BFAR/NCK1/PTPN1/OPA1/USP14/WFS1/NR1H2/PPP1R15B/USP25/HSPA5/AQP11/HSPA1A
