# Supplementary material for: The enteric pathogen Cryptosporidium parvum exports proteins into the cytosol of the infected host cell
Source: eLife. 2021 Dec 6;10:e70451. doi: 10.7554/eLife.70451 (PMC8687662; doi:10.7554/eLife.70451)
Supplement: Figure 6—source data 2. [file elife-70451-fig6-data2.xlsx]

## Sheet: ER Stress_transfection datatset
Figure 6- source data. A summary of ER stress response genes detected in the Gene Set Enrichment Analysis for the MEDLE2 transfection dataset and the Cryptosporidium infection of a homoestatic mini-gut are shown.
Detection of core enrichment of the gene is indicated by a yes in column E.
SYMBOL	RANK IN GENE LIST	RANK METRIC SCORE	RUNNING ES	CORE ENRICHMENT
NUPR1	26	1.95691	0.0393535	Yes
CREB3L1	52	1.63043	0.0718943	Yes
FBXO2	98	1.3711	0.0974824	Yes
BBC3	128	1.25639	0.121837	Yes
RASGRF2	195	1.0846	0.139825	Yes
SERP2	524	0.729238	0.130903	Yes
DDIT3	700	0.638698	0.131408	Yes
GET4	767	0.609371	0.139372	Yes
CHAC1	791	0.598902	0.150301	Yes
PIGBOS1	905	0.554706	0.153629	Yes
TRIB3	949	0.538963	0.161812	Yes
EXTL1	978	0.530128	0.17092	Yes
ATP2A1	1009	0.520399	0.179674	Yes
MAP3K5	1073	0.505484	0.185669	Yes
TMUB1	1092	0.500087	0.194884	Yes
DNAJB2	1183	0.469357	0.198116	Yes
USP13	1207	0.462914	0.206177	Yes
DNAJC18	1223	0.457482	0.214715	Yes
GRINA	1259	0.447797	0.221568	Yes
LRRK2	1277	0.444703	0.229689	Yes
PLA2G4B	1666	0.358519	0.2085	No
GSK3A	1747	0.343064	0.209809	No
TMEM129	1801	0.333513	0.212917	No
RCN3	1863	0.322541	0.215201	No
NCK2	2059	0.293132	0.206934	No
SVIP	2167	0.276592	0.20484	No
ALOX5	2194	0.273211	0.208677	No
ASNS	2544	0.236208	0.187798	No
PMAIP1	2658	0.223711	0.184144	No
ERLIN2	2679	0.221364	0.187331	No
STT3B	2744	0.214461	0.187113	No
CTH	2775	0.211054	0.189342	No
PARP16	2806	0.20818	0.19151	No
CREB3L4	2951	0.196008	0.184974	No
ATF3	2966	0.194577	0.188041	No
XBP1	2996	0.191911	0.189941	No
STUB1	3068	0.186659	0.188617	No
ATF4	3081	0.185828	0.191648	No
DNAJB14	3194	0.17642	0.18707	No
PPP2R5B	3207	0.175664	0.189886	No
MAN1A1	3268	0.172027	0.189069	No
PPP1R15A	3288	0.17049	0.191257	No
FBXO6	3296	0.169922	0.194323	No
NFE2L2	3358	0.165979	0.193304	No
TMEM259	3409	0.162827	0.193034	No
DDRGK1	3422	0.161979	0.195562	No
UBXN6	3447	0.159802	0.197154	No
CREB3L2	3559	0.152066	0.192137	No
ERP29	3623	0.147907	0.190588	No
RNF103	3739	0.140954	0.18504	No
UBE2J1	3773	0.13892	0.185525	No
FBXO44	3811	0.136864	0.18567	No
SULT1A4	3812	0.136864	0.188557	No
SESN2	3933	0.129644	0.1824	No
UBXN1	4005	0.125138	0.179779	No
YIF1A	4123	0.119052	0.17362	No
CREB3	4167	0.117157	0.172905	No
FICD	4209	0.114869	0.17229	No
RNF121	4229	0.113757	0.173282	No
GOSR2	4271	0.111103	0.172587	No
RNF139	4276	0.110906	0.17463	No
COPS5	4347	0.106996	0.1717	No
BAG6	4443	0.102618	0.166825	No
DAB2IP	4498	0.0997689	0.164928	No
EDEM1	4553	0.096967	0.162972	No
UFM1	4558	0.0968023	0.164718	No
ATXN3	4666	0.0911024	0.158711	No
CLGN	4753	0.0870271	0.154174	No
UBE2J2	4792	0.0858792	0.15317	No
SIRT1	5039	0.0747375	0.136517	No
SERP1	5053	0.0742742	0.137121	No
EIF2S1	5128	0.07075	0.13313	No
RNF5	5220	0.0666441	0.127792	No
WIPI1	5245	0.0659136	0.127404	No
FLOT1	5256	0.0654446	0.128044	No
SRPRB	5327	0.0626208	0.124178	No
FBXO17	5329	0.0625381	0.125423	No
BAX	5397	0.059922	0.121722	No
ERO1A	5428	0.0588391	0.12074	No
RNF175	5462	0.0576792	0.119512	No
EIF2AK4	5565	0.0534043	0.11308	No
UBXN4	5646	0.0503595	0.108214	No
POMT2	5675	0.0494057	0.107181	No
MANF	5822	0.0436697	0.0972836	No
ATF6B	5914	0.0398255	0.0913805	No
AUP1	6010	0.0366877	0.0851148	No
UFC1	6047	0.0350649	0.0831868	No
SYVN1	6066	0.0344751	0.0825802	No
NR1H3	6180	0.029639	0.074832	No
VAPB	6191	0.0292436	0.0747078	No
SEC31A	6283	0.0254893	0.0685023	No
MAN1B1	6395	0.0213714	0.0607278	No
JUN	6396	0.0213514	0.0611782	No
RNFT1	6407	0.0208361	0.0608767	No
RACK1	6423	0.0201971	0.0601913	No
LMNA	6466	0.0190043	0.0574799	No
DERL2	6502	0.0179202	0.0552644	No
UBA5	6544	0.0166318	0.052577	No
PTPN2	6612	0.0141905	0.0479116	No
MYDGF	6616	0.0138769	0.047982	No
UFL1	6626	0.0133914	0.0475976	No
SGTB	6679	0.0111687	0.0439799	No
EEF2	6866	0.00511242	0.0303049	No
ERN1	6883	0.00449705	0.0292141	No
BAK1	6952	0.00215437	0.0242206	No
UBE2K	7123	-0.00408557	0.0117096	No
ATG10	7225	-0.00817675	0.0043978	No
TMCO1	7304	-0.0111549	-0.00114681	No
PARK7	7366	-0.0134326	-0.00538365	No
HM13	7373	-0.0139327	-0.00553435	No
ABCA7	7376	-0.0141126	-0.00538486	No
EIF2B5	7417	-0.0155174	-0.00802158	No
CXXC1	7465	-0.0176442	-0.0111322	No
TMEM117	7659	-0.0248118	-0.0249104	No
DNAJB9	7668	-0.0249664	-0.0249765	No
RHBDD2	7671	-0.0249946	-0.0245975	No
BCAP31	7686	-0.0254907	-0.0250972	No
GORASP2	7704	-0.0262313	-0.0258036	No
UBQLN1	7753	-0.0280292	-0.0287692	No
ZBTB17	7764	-0.0283873	-0.0289114	No
OS9	7765	-0.0284046	-0.0283122	No
PSMC6	7801	-0.0293919	-0.0302857	No
SRPX	7812	-0.0296885	-0.0304005	No
CAV1	7846	-0.0307092	-0.032198	No
TMEM33	7880	-0.0323457	-0.0339611	No
PDIA5	7892	-0.0327966	-0.0340843	No
CDK5RAP3	7894	-0.032807	-0.0334664	No
SEC61B	7931	-0.0340827	-0.0354151	No
BRSK2	7958	-0.0348122	-0.0366074	No
PPP2CB	7995	-0.0364995	-0.0385051	No
HDGF	8009	-0.0369718	-0.0386885	No
TP53	8062	-0.0393104	-0.0417125	No
RNF185	8164	-0.0434368	-0.0482805	No
ANKZF1	8169	-0.0435993	-0.0476572	No
TBL2	8175	-0.0439139	-0.0471014	No
AIFM1	8179	-0.0441316	-0.0463927	No
SCAMP5	8255	-0.047318	-0.0509522	No
TRAF2	8275	-0.0477963	-0.0513519	No
TXNDC12	8278	-0.0480008	-0.0504875	No
DNAJC3	8290	-0.0484196	-0.0502813	No
UBAC2	8307	-0.0491335	-0.0504304	No
TMBIM6	8332	-0.0501966	-0.05115	No
NPLOC4	8335	-0.0502685	-0.0502378	No
ATF6	8357	-0.0511597	-0.0507147	No
CCDC47	8374	-0.0519078	-0.0508054	No
HERPUD1	8415	-0.0533802	-0.0526434	No
DNAJB11	8418	-0.0534074	-0.051665	No
TMED2	8455	-0.0547407	-0.0531779	No
ACADVL	8481	-0.0559474	-0.0538503	No
SGTA	8601	-0.0606325	-0.0613894	No
TMX1	8628	-0.0621226	-0.0620055	No
ERP44	8637	-0.0625495	-0.0612789	No
SSR1	8730	-0.0658071	-0.0667081	No
THBS4	8762	-0.0672756	-0.0675861	No
SULT1A3	8799	-0.0690841	-0.0687964	No
BCL2L11	8820	-0.0704397	-0.0687925	No
TLN1	8885	-0.0726136	-0.0720033	No
TOR1A	8898	-0.073357	-0.0713451	No
DERL1	9044	-0.0792366	-0.0804183	No
CLU	9064	-0.0800524	-0.0801376	No
HERPUD2	9070	-0.0801556	-0.0788172	No
TMUB2	9072	-0.080211	-0.0771993	No
SDF2L1	9079	-0.0803396	-0.0759492	No
NRBF2	9081	-0.0804843	-0.0743255	No
DDX11	9085	-0.0806325	-0.0728469	No
P4HB	9209	-0.0858156	-0.0801512	No
CTDSP2	9223	-0.0867784	-0.0792839	No
DCTN1	9255	-0.0885532	-0.0797131	No
MAGEA3	9260	-0.0887247	-0.0781379	No
TRIM25	9349	-0.0920561	-0.0827169	No
CCND1	9365	-0.0924937	-0.0818773	No
TARDBP	9372	-0.0928281	-0.0803638	No
TPP1	9373	-0.0928562	-0.078405	No
GSK3B	9383	-0.0933624	-0.0771025	No
FAF2	9398	-0.0941488	-0.0761539	No
ERLIN1	9404	-0.0944099	-0.0745328	No
PDIA6	9416	-0.0949545	-0.0733449	No
UGGT2	9434	-0.0955952	-0.0725881	No
TRIM13	9436	-0.0957115	-0.0706432	No
LPCAT3	9454	-0.0963915	-0.0698696	No
DNAJB12	9538	-0.100499	-0.0739	No
PREB	9558	-0.101024	-0.0731769	No
EXTL2	9620	-0.103597	-0.0755118	No
ADD1	9642	-0.104481	-0.0748639	No
PDIA3	9708	-0.107414	-0.0774147	No
USP19	9709	-0.10745	-0.0751481	No
ERLEC1	9734	-0.108352	-0.0746409	No
BFAR	9740	-0.108525	-0.0727221	No
RHBDD1	9783	-0.111067	-0.0734914	No
MBTPS2	9814	-0.112562	-0.07334	No
DNAJC10	9938	-0.117773	-0.0799701	No
DERL3	9952	-0.118331	-0.0784373	No
TNFRSF10B	9964	-0.118733	-0.0767478	No
UBQLN2	10018	-0.121162	-0.0781193	No
GFPT1	10019	-0.121349	-0.0755595	No
SERINC3	10029	-0.121767	-0.0736578	No
KLHDC3	10060	-0.123036	-0.0732855	No
USP14	10085	-0.124652	-0.0724344	No
TSPYL2	10106	-0.125555	-0.0712679	No
UBXN8	10109	-0.125643	-0.0687657	No
ARFGAP1	10123	-0.126617	-0.0670581	No
HSP90B1	10134	-0.127054	-0.065119	No
SHC1	10143	-0.127556	-0.0630211	No
ATP2A2	10282	-0.134362	-0.0704128	No
OPA1	10316	-0.136478	-0.0699792	No
VCP	10321	-0.136742	-0.0673911	No
TMTC3	10353	-0.138072	-0.0667757	No
HSPA5	10480	-0.144221	-0.0730702	No
EIF4G1	10481	-0.144225	-0.0700278	No
ITPR1	10510	-0.146126	-0.0690202	No
BCL2L1	10520	-0.146529	-0.0665962	No
PTPN1	10559	-0.148664	-0.066276	No
PIK3R2	10580	-0.149759	-0.0645989	No
UBE4A	10624	-0.151841	-0.0645823	No
ATP6V0D1	10633	-0.152283	-0.0619627	No
CALR	10685	-0.155274	-0.0624665	No
PDIA4	10686	-0.155311	-0.0591903	No
EDEM2	10701	-0.156063	-0.0569356	No
DDX3X	10757	-0.159146	-0.0576541	No
FKBP14	10788	-0.160658	-0.0564881	No
CUL7	10821	-0.162626	-0.0554288	No
NCK1	10823	-0.16274	-0.05207	No
WFS1	10878	-0.166418	-0.052561	No
UBE2G2	10991	-0.174613	-0.0571769	No
NR1H2	11071	-0.179486	-0.0592448	No
ERMP1	11078	-0.179825	-0.0558961	No
KDELR3	11082	-0.180124	-0.0523187	No
TATDN2	11105	-0.18179	-0.0501142	No
APAF1	11187	-0.187425	-0.0521627	No
PPP1R15B	11302	-0.195732	-0.0564814	No
FOXRED2	11404	-0.20261	-0.0596917	No
UGGT1	11428	-0.204591	-0.0570803	No
EIF2AK3	11454	-0.206534	-0.0545761	No
UBE4B	11595	-0.219865	-0.0603123	No
SEL1L	11598	-0.219924	-0.0558213	No
SRPRA	11684	-0.227624	-0.0573183	No
CANX	11725	-0.231018	-0.0554091	No
HYOU1	11769	-0.234758	-0.0536434	No
CREBRF	11858	-0.243951	-0.0550183	No
EP300	11913	-0.251047	-0.053724	No
AMFR	12012	-0.261351	-0.0554729	No
MBTPS1	12151	-0.277105	-0.0598535	No
SEC16A	12431	-0.317548	-0.0738292	No
PIK3R1	12588	-0.342044	-0.0781738	No
PML	12615	-0.347399	-0.0727722	No
TMEM67	12673	-0.358322	-0.0694373	No
EXTL3	12793	-0.385047	-0.070133	No
JKAMP	12798	-0.386495	-0.0622764	No
EDEM3	12844	-0.399396	-0.0571859	No
YOD1	12849	-0.40101	-0.0490232	No
TMTC4	13128	-0.501111	-0.0590527	No
USP25	13206	-0.535108	-0.0534706	No
AQP11	13218	-0.539403	-0.0429072	No
FBXO27	13542	-0.811065	-0.049733	No
ATP2A3	13661	-1.12771	-0.0346883	No
HSPA1A	13735	-1.95353	0.00111131	No

## Sheet: mini-guts
SYMBOL	RANK IN GENE LIST	RANK METRIC SCORE	RUNNING ES	CORE ENRICHMENT
TFRC	18	5	0.0796142	Yes
ASNS	27	5	0.164359	Yes
STC2	134	2.74897	0.158821	Yes
NUPR1	152	2.42596	0.193208	Yes
HSPA1B	158	2.33525	0.23214	Yes
UPP1	174	2.14305	0.262525	Yes
CHAC1	242	1.63389	0.257183	Yes
SLC3A2	245	1.60171	0.284619	Yes
ACTB	271	1.47632	0.298026	Yes
DDIT3	324	1.27016	0.293917	Yes
TUBB4B	329	1.25662	0.314194	Yes
HMGCR	344	1.21708	0.328639	Yes
SQLE	355	1.17744	0.344431	Yes
TRIB3	367	1.1513	0.359245	Yes
HMOX1	396	1.0669	0.363838	Yes
TOB1	401	1.04934	0.380432	Yes
EIF4EBP1	411	1.03337	0.394177	Yes
ACTG1	422	1.01229	0.407034	Yes
HSPA5	482	0.878278	0.392369	Yes
BHLHE40	503	0.840204	0.397038	Yes
INSIG1	514	0.81572	0.406403	Yes
AURKA	529	0.79091	0.413274	Yes
LDLR	600	0.671096	0.389283	No
HMGCS1	687	0.56383	0.355177	No
IDI1	767	0.442323	0.322504	No
CCNB1	804	0.407106	0.311267	No
CDC20	809	0.397424	0.316277	No
SLC20A1	825	0.380013	0.315333	No
PMAIP1	830	0.377252	0.319985	No
TUBA1B	842	0.361537	0.320765	No
PLK1	874	0.309639	0.310362	No
FAM83D	948	0.227118	0.276943	No
DNMT1	1010	0.167022	0.248613	No
ATF3	1011	0.166486	0.251571	No
RFC4	1143	0.0590531	0.185407	No
BEX2	1147	0.0577368	0.184893	No
ECT2	1449	-0.0650357	0.0316108	No
IFRD1	1545	-0.17626	-0.014	No
ANLN	1556	-0.196125	-0.0156457	No
GADD45A	1572	-0.22001	-0.0194324	No
TIPIN	1601	-0.26248	-0.0291345	No
PPP1R15A	1694	-0.4662	-0.0680538	No
CKS1B	1771	-0.707023	-0.0944844	No
DDIT4	1794	-0.816938	-0.0912554	No
KIF20A	1819	-0.96437	-0.0864326	No
DNAJB1	1827	-1.00719	-0.0721265	No
CENPM	1835	-1.06142	-0.0568566	No
ACTN1	1845	-1.12864	-0.0414185	No
ARL6IP1	1897	-1.67249	-0.0378657	No
TMSB4X	1930	-2.36689	-0.0122248	No
OAT	1941	-2.65135	0.0297587	No
