# Supplementary material for: The enteric pathogen Cryptosporidium parvum exports proteins into the cytosol of the infected host cell
Source: eLife. 2021 Dec 6;10:e70451. doi: 10.7554/eLife.70451 (PMC8687662; doi:10.7554/eLife.70451)
Supplement: Supplementary file 1. [file elife-70451-supp1.xlsx]

## Sheet: Sheet1
Supplemental File 1- The oligo sequences for primers used to generate genetic reagents used this study are provided below.
Name	Primer sequence
g5_4590 F	gttgaggattatccggttcaagta
g5_4590 R	aaactacttgaaccggataatcct
5_4590 Lic repair F	aaaaagaaaaagagaagagggggaaaagatgatcttagaggactattaagaggattatccggttcaagtaaagacatactacacgacttagagaaaattggaagtggaggacgggaattc
5_4590 Lic repair R	taattatcttgttaataacacatttgaatagtttatacttcacataaccaaattaagataaaaagaaaaacttaatcgatactatcctacacg
g4_4470 F	gttgatgaacttcttggaatacgt
g4_4470 R	aaacacgtattccaagaagttcat
4_4470 Lic repair F2	aaaattttaagaaacaatttaatcagtgtcttcaagctaaagaaggatataatgaacttcttggaatacgtagaaacacggacatccaggagaagagtttgaagaagtcaacc
4_4470 Lic repair F	ggagaagagtttgaagaagtcaaccgcccaggaacggatcaacttgaacttaaagtacccgttcttgaacttgttcaaaattggaagtggaggacgggaattc
4_4470 Lic repiar R	aagaaaaatattaacttgaacagttcaagtaaattttgattaaatttctgaattaagataaaaagaaaaacttaatcgatactatcctacacg
g5_3570 F	gttgcaacataggctatttaattg
g5_3570 R	aaaccaattaaatagcctatgttg
5_3570 Lic repair F	caacaattacctaattttttaatttagtcacaaaggtaaaatgggccaggaaaaattggaagtggaggacgggaattc
5_3570 Lic repair R	ataattaaacctaatatggagtattttgtgaaactttgagaatattactctaattaagataaaaagaaaaacttaatcgatactatcctacacg
g1_3850 F	gttggttgttattccacttgtaca
g1_3850 R	aaactgtacaagtggaataacaac
1_3850 Lic repair F1	atactcagtgcattagagctgtgtggcagcttaattcaaactttgcatgaagtcgtaatccgctcgtgcacggtaaggagttgatgtacctcaagttgttagagaggacg
1_3850 Lic repair F2	cctcaagttgttagagaggacgttcgtcaagttcttcatcaaattcttgatcttcctccagcagaagaaggacgagaaaattggaagtggaggacgggaattc
1_3850 Lic repair R	cgttgcaatttaatacaaacatttgaaaaggcatatccaattatatatctaaattaagataaaaagaaaaacttaatcgatactatcctacacgc
g8_30 F	gttgaaatctctcccttctagact
g8_30 R	aaacagtctagaagggagagattt
8_30 Lic repair F1	gctcgagagggagttgatcaagatcttcacccaccagttgatcctcctgcagaagaaaaactccaaaattggaagtggaggacgggaattc
8_30 Lic repair F2	tcattagaaaaatgcggtaacgcgattcaaatgttgcatttagaaattgcaccgagcctggagggaagggacttttttgaggcgaaattgctcgagagggagttgatcaag
8_30 Lic repair R	gaaacaaatacattagaaaacaatattgtttgactcgttaaatatttctaaaaagtccctgccctccaggcttggaattaagataaaaagaaaaacttaatcgatactatcctacacg
g8_3560 F	gttgggattaatcacttcacattt
g8_3560 R	aaacaaatgtgaagtgattaatcc
8_3560 Lic repair F	ggctttacgaaaattacaaaaatatttactaatcgcaagacgaggatttctggcttgataacctcgcacttgggttcggccgaccaaaaaattggaagtggaggacgggaattc
8_3560 Lic repair R	aagaaataaaatgtaaaatattggtcacagtacaattcatattatatgccaaattaagataaaaagaaaaacttaatcgatactatcctacacg
5' 5_4590 int F	gccagtacttaagaatgtgaatttatca
Nluc Int R	ctttggatcggagttacggacac
Neo Int F	cgtatcgaacgtgctcgta
3' 5_4590 int R	attagtatgaagaagtctaatcacaatatttcc
TK gene F	atggcaaaattatacttttactattcagcaatgaatgc
TK gene R	ttagaaattgtattcttcacaattaattatatgatgttttctgc
5' 8_30 int F	cgatcctcagaatgaacctaatcttaa
3' 8_30 int R	ctggaatattgcatgcaagtcaaa
5' 8_3560 int F	gagcaagctctcaagaagatttatcat
3' 8_3560 int R	caagttatgcgcaaactctatttgag
g2 cgd6_5490 F	gttggaagtcaaggccaagaggttc
g2 cgd6_5490 R	aaacgaacctcttggccttgacttc
6_5490g2 Lic repair F1	gatcaggtaaacatttctctgagaagatttgcggaccttgtaagaacataaacatggaggacttagagaaaattggaagtggaggacgggaattc
6_5490g2 Lic repair F2	gattcaggtcgaaaacgtcaacataaaagaaaagtaaggaaaaataaaaataaatctagacctaggggatcaggtaaacatttctctgagaagatttgc
6_5490 g2 Lic Lic R	tcttggttatatcttgtttaaaaatcataaaataataatcatattaacaacacatttgagaattaagataaaaagaaaaacttaatcgatactatcctacacg
g2cgd5_4580 F	gttggaagttaaggccaagaagttc
g2cdg5_4580 R	aaacgaacttcttggccttaacttc
Pexel 31 g2 Lic F	tgagaataaacatgatcaagtagattcaggtcaaaaacgccgaaaaaaaaaagaaaaaaaaaaagtagagactagcaaaattggaagtggaggacgggaattc
Pexel 31 g2 Lic R	cttccatactcaaatttttgtattgagcatatgcctttagtgaaaagtgtctaaattaagataaaaagaaaaacttaatcgatactatcctacacg
Medle6 integration F	agctttacgaatgaaagatccgg
Medle 6 integration R	ctcttttctcatatcgaaactaataccaca
5' 5_4580 int F	gccaaatttggaaatattgagatagag
3' 5_4580 int R	cgaataaatttccacctaacattttttttttctc
Medle2 prom lin F	aaaattggaagtggaggacggg
Medle2 prom lin R	aaagggaacaaaagctgggtacc
Medle1 with prom insert F	aaagggaacaaaagctgggtaccatttaagattaaataaaaatcataaaatatgtaattaatagcga
Medle1 with prom insert R	cccgtcctccacttccaattttacttgtctctactttttttttttcttttttttttc
Medle2 prom ins F	aaagggaacaaaagctgggtacctaactaactataatttgaattaattagaataacagtaataaatagttt
Medle2 prom ins R	aataataataataatattattattattttgttttttataaacatccttaattattcataatgcaaaaacaaaaaattaattaaac
Medle1 HA lin F	atgtttataaaaaacaaaataataataatattattattattattatttattaactttttatttttgtttgaaaatataaccg
gMedle2 KO	gttggccatttgatgagccattaga
gMedle2 KO	aaactctaatggctcatcaaatggc
Medle2 KO repair F	gtttgaaaatgtaaccgataattttttgtttaaaaaagatgtttcattaaaagataggtagcggtggtcg
Medle2 KO repair R	ttccaaatcatgaagaatatccttacttgaaccggataatcctcttaatagtaattaagataaaaagaaaaacttaatcgatactatcctacacg
lin LIC in eno3' UTR	caattggttcgtggcgtgtagga
lin LIC in Neo R	gaagacgatagaaggcgatacgttga
2AtdNeon F	aacgtatcgccttctatcgtcttcttgacgaattcttcggtgagggcaggggtagattg
2AtdNeon R	tacacgccacgaaccaattgtcacttgtacagctcgtccatgc
Lin LIC F	cccgggatgcatcttcatttag
Lin LIC R	gaattcccgtcctccacttc
mScarlet F	gaagtggaggacgggaattcatggtgagcaagggcgagg
mScarlet R	tgaagatgcatcccgggttacttgtacagctcgtccatgc
BLA F	gaagtggaggacgggaattcatgagtattcaacatttccgtgtcgc
BLA R	aatgaagatgcatcccgggttaccaatgcttaatcagtgaggcacc
lin 2A R	cgggccggggttctcctcaacg
tdTomato 2a F	cgttgaggagaaccccggcccgatggtgagtaagggcgaggaag
tdTomato eno3' R	tcctacacgccacgaaccaattgtcacttatacagctcatccatgccg
Cre tagging Gibson F	gaggacgggaattcccctaggggcgcccccaag
Cre tagging Gibson R	actaaatgaagatgcatccccgggctagacagatctaaggc
Lin in Lic site inker F	aaaattggaagtggaggacgggaattc
Lin in Lic R	ggtacccagcttttgttccctttagt
MEDLE2 with promoter F	actaaagggaacaaaagctgggtacctaactaactataatttgaattaattagaataacagtaataaatagttttatatc
MEDLE2 with promoter R	gaattcccgtcctccacttccaattttttccaaatcatgaagaatatccttacttgaac
TK homology with M2 prom repair F	tccagtactatgctatggtttgagaacagactttaagggaaatttatttgataactaactataatttgaattaattagaataacagtaataaatagttttatatc
TK homology with M2 prom repair R	tagcttttttgccacagcgacaaatagttttgatttcagtaagtttatcaaattaagataaaaagaaaaacttaatcgatactatcctacacg
gTK int	gttggaagtaaatacttattagca
gTK int	aaactgctaataagtatttacttc
lin Extra M2 for No SP F	cccgggatgcatcttcattta
lin Extra M2 for No SP R	ccttaattattcataatgcaaaaacaaaaaattaatt
M2 No SP F	ttttgtttttgcattatgaataattaaggatggaaaatgtaaccgataattttttgtttaaaaaagatg
M2 no SP R	taaatgaagatgcatcccgggttaggcataatctggaacatcgtaagg
lin Extra M2 Mut 1 F	aaaattaggaatgaaacaccaaatg
lin Extra M2 Mut 1 R	tttaaacaaaaaattatcggttacattttc
M2 Mut 1 F	gaaaatgtaaccgataattttttgtttaaagccgctgcagctgcagct
M2 Mut 1 R	catttggtgtttcattcctaattttagctgcagctgcagcggc
lin Extra M2 Mut 2 F	gtgaatttatcaaaaaaaggtggtgc
lin Extra M2 Mut 2 R	tttaccaccactacctcctcc
M2 Mut 2 F	ggaggaggtagtggtggtaaagccgctgcagctgcagct
M2 Mut 2 R	accacctttttttgataaattcacagctgcagctgcagcggc
lin Extra M2 Mut 3 F	aaaaaaggtggtgctggaaattg
lin Extra M2 Mut 3 R	aagtactggctttttaccaccac
M2 Mut 3 F	gtggtggtaaaaagccagtacttgccgctgcagctgcagct
M2 Mut 3 R	caatttccagcaccaccttttttagctgcagctgcagcggc
lin Extra M2 Mut 4 F	tcaagtaaggatattcttcatgatttggaa
lin Extra M2 Mut 4 R	aagatcatcttttccccctcttct
M2 Mut 4 F	gaagagggggaaaagatgatcttgccgctgcagctgcagctgcagccgct
M2 Mut 4 R	ccaaatcatgaagaatatccttacttgaagcggctgcagctgcagctgcagcggc
lin extra copy M2 F	cccgggatgcatcttcatt
lin extra copy M2 R	ttttattaatgaaacatcttttttaaacaaaaaattatcg
M2 P1 F	gaaaatgtaaccgataattttttgtttaaagccgatgtttcattaata
M2 P1 R	catttggtgtttcattcctaatttttattaatgaaacatcggc
M2 P2 F	gaaaatgtaaccgataattttttgtttaaaaaagctgtttcattaata
M2 P2 R	catttggtgtttcattcctaatttttattaatgaaacagcttt
M2 P3 F	gaaaatgtaaccgataattttttgtttaaaaaagatgcatcattaata
M2 P3 R	catttggtgtttcattcctaatttttattaatgatgcatcttt
M2 P4 F	gaaaatgtaaccgataattttttgtttaaaaaagatgttgctttaata
M2 P4 R	catttggtgtttcattcctaatttttattaaagcaacatcttt
M2 P5 F	gaaaatgtaaccgataattttttgtttaaaaaagatgtttcagcaata
M2 P5 R	catttggtgtttcattcctaatttttattgctgaaacatcttt
M2 P6 F	gaaaatgtaaccgataattttttgtttaaaaaagatgtttcattagct
M2 P6 R	catttggtgtttcattcctaattttagctaatgaaacatcttt
M13 F	tgtaaaacgacggccagt
M13 R	caggaaacagctatgacc
HA seq R primer	cgtcgtacgggtacctagg
Medle2 entire gene F	gagttacaatcttttaaggatatcttatttctacgag
lin for mut 1 F	aagatccgcaatgagaccc
lin for mut 1 R	tttaaaaaggaagttgtctgtcac
mut 1 trans ins F	gtgacagacaacttcctttttaaagccgctgcagctgcagct
mut 1 trans ins R	gggtctcattgcggatcttagctgcagctgcagcggc
lin for mut 2 F	gtgaatctgtcaaagaagggcggcgc
lin for mut 2 R	cttgccgccggaaccgcc
mut 2 trans ins F	ggcggttccggcggcaaggccgctgcagctgcagct
mut 2 trans ins R	gcgccgcccttctttgacagattcacagctgcagctgcagcggc
lin for mut 3 F	aagaagggcggcgcagg
lin for mut 3 R	cagtacaggtttcttgccgccg
mut 3 trans ins F	cggcggcaagaaacctgtactggccgctgcagctgcagct
mut 3 trans ins R	cctgcgccgcccttcttagctgcagctgcagcggc
lin for mut 4 F	agttccaaggacatacttcacgat
lin for mut 4 R	caagtcatccttaccccctcttc
mut 4 trans ins F	gaagagggggtaaggatgacttggccgctgcagctgcagctgcagccgct
mut 4 trans ins R	atcgtgaagtatgtccttggaactagcggctgcagctgcagctgcagcggc
eGFP trans R	gaagtggaggacgggaattcatggtgagcaagggcgag
eGFP trans R	ctagagtcgcggccgcttttacttgtacagctcgtccatgc
linEGFP remove F	agcggccgcgactctagatc
eGFP insert F	cgtcagatccgctagcgccatggtgagcaagggcgag
eGFP insert R	gatctagagtcgcggccgctttacttgtacagctcgtccatgc
lin eGFP F2	agcggccgcgactctagatc
lin eGFP R2	ggcgctagcggatctgacg
Recod M2 insert F	cgtcagatccgctagcgccatggagaatgtgacagacaacttcc
Recod M2 insert R	gaattcccgtcctccacttccaattttttcgagatcgtgaagtatgtccttg
mTRIB3 F	ctgcgtcgctttgtcttcagca
mTRIB3 R	ctgagtatctctggtcccacgt
mCHAC1 F	tgaccctccttgaagaccgtga
mCHAC1 R	agtgtcatagccaccaagcacg
mDDIT3 F	ggaggtcctgtcctcagatgaa
mDDIT3 R	gctcctctgtcagccaagctag
mNUPR1 F	gaatatgatcagtacagcctggc
mNUPR1 R	cagagttctggaacttggtcagc
18s F	ctccaccaactaagaacggcc
18s R	tagagattggaggttgttcct
B actin F	ggctgtattcccctccatcg
B actin R	ccagttggtaacaatgccatgt
Recodonized MEDLE2 aa 21-209	atggagaatgtgacagacaacttcctttttaaaaaggacgtgtcactgattaagatccgcaatgagacccctaatgaggggagttcttcttcagggaactccaacaagaagtgctccagtaggggaggaggacgaggaggtggcggttccggcggcaagaaacctgtactgaagaacgtgaatctgtcaaagaagggcggcgcaggcaattgttccatctaccaccaccaccatcaccaccaccatcagctctcctcaactccacaaacaagagatccgtccaacctcagtagtgacccattcgacgagcctttggatggtccataccagaattccaacaataaaaacgacaacaaggaggatgaagaagaagaggaagaggaagaggaggaggaggaa…
No SP GRA16 F	CGTCAGATCCGCTAGCGCCatgTTAGAAAATGTCTCTGGTATTCACCGGTTCG
NO SP GRA16 R	gaattcccgtcctccacttccaattttCATCTGATCATTTTTCCGCTTCGCGC
hCHAC1 F	CCTGAAGTACCTGAATGTGCGAGA
hCHAC1 R	GCAGCAAGTATTCAAGGTTGTGGC
hDDIT3 F	cagaaccagcagaggtcaca
hDDIT3R	agctgtgccactttcctttc
hNUPR1 F	ATAGCCTGGCCCATTCCTAC
hNUPR1 R	GCCTCCACCTCCTGTAACC
hTRIB3 F	TGGTACCCAGCTCCTCTACG
hTRIB3 R	GACAAAGCGACACAGCTTGA
